# Supplementary material
Source: PubMed Central journal article supplement (PMC9747687)

# Appendix A

Table A1. Logged Employment Outcome: Coefficients for Disability x Quarter Interactions, By Occupational Category, Without Demographic Controls

|                    | (1)                    | (2)                    | (3)                    | (4)                    | (5)                    | (6)                    | (7)                    |
|--------------------|------------------------|------------------------|------------------------|------------------------|------------------------|------------------------|------------------------|
|                    | Employed               | Essential              | Non-Ess.               | Teleworkable           | Non-Tele.              | Frontline              | Non-Front.             |
| Disabled           | -0.935***<br>(0.0145)  | -0.898***<br>(0.0247)  | -1.023***<br>(0.0149)  | -1.100***<br>(0.0101)  | -0.828***<br>(0.0162)  | -0.799***<br>(0.0237)  | -1.049***<br>(0.00823) |
| Disabled × Q1 2020 | 0.0296<br>(0.0179)     | -0.00390<br>(0.0272)   | 0.108***<br>(0.0198)   | 0.0446***<br>(0.0109)  | 0.00944<br>(0.0226)    | -0.0237<br>(0.0293)    | 0.0788***<br>(0.0127)  |
| Disabled × Q2 2020 | 0.00225<br>(0.0473)    | -0.0000915<br>(0.0463) | 0.00238<br>(0.0650)    | 0.00344<br>(0.0177)    | -0.00518<br>(0.0775)   | -0.0199<br>(0.0678)    | 0.0280<br>(0.0332)     |
| Disabled × Q3 2020 | 0.000411<br>(0.0239)   | 0.0232<br>(0.0322)     | -0.0589**<br>(0.0277)  | 0.00347<br>(0.0247)    | 0.00480<br>(0.0238)    | 0.0113<br>(0.0294)     | -0.00631<br>(0.0273)   |
| Disabled × Q4 2020 | 0.00419<br>(0.0176)    | 0.0198<br>(0.0292)     | -0.0424*<br>(0.0248)   | 0.0245<br>(0.0156)     | -0.00878<br>(0.0280)   | -0.00446<br>(0.0363)   | 0.0136<br>(0.0107)     |
| Disabled × Q1 2021 | -0.0139<br>(0.0180)    | -0.0179<br>(0.0272)    | -0.00722<br>(0.0297)   | 0.0146<br>(0.0134)     | -0.0281<br>(0.0221)    | -0.0341<br>(0.0292)    | 0.00906<br>(0.0148)    |
| Disabled × Q2 2021 | 0.0212<br>(0.0208)     | 0.00883<br>(0.0281)    | 0.0507*<br>(0.0266)    | 0.0912***<br>(0.0174)  | -0.0154<br>(0.0305)    | -0.0145<br>(0.0339)    | 0.0573***<br>(0.0135)  |
| Disabled × Q3 2021 | 0.0526<br>(0.0368)     | 0.0626<br>(0.0422)     | 0.0284<br>(0.0377)     | 0.127***<br>(0.0441)   | 0.00364<br>(0.0333)    | 0.0222<br>(0.0336)     | 0.0804*<br>(0.0434)    |
| Disabled × Q4 2021 | 0.107***<br>(0.0189)   | 0.102***<br>(0.0285)   | 0.117***<br>(0.0184)   | 0.146***<br>(0.0216)   | 0.0854***<br>(0.0186)  | 0.0676***<br>(0.0252)  | 0.145***<br>(0.0209)   |
| Disabled × Q1 2022 | 0.0941***<br>(0.0256)  | 0.0825**<br>(0.0397)   | 0.120***<br>(0.0258)   | 0.123***<br>(0.0195)   | 0.0778***<br>(0.0296)  | 0.0335<br>(0.0488)     | 0.150***<br>(0.0144)   |
| Disabled × Q2 2022 | 0.121***<br>(0.0172)   | 0.130***<br>(0.0291)   | 0.0950***<br>(0.0281)  | 0.166***<br>(0.0201)   | 0.0815***<br>(0.0176)  | 0.0812***<br>(0.0273)  | 0.158***<br>(0.0166)   |
| Constant           | -0.295***<br>(0.00318) | -0.672***<br>(0.00139) | -1.452***<br>(0.00712) | -1.141***<br>(0.00518) | -0.883***<br>(0.00300) | -1.157***<br>(0.00266) | -0.843***<br>(0.00536) |
| Weighted           | Yes                    |
| Robust SE          | Yes                    |
| N                  | 240                    | 240                    | 240                    | 240                    | 240                    | 240                    | 240                    |

\*  $p < 0.10$ , \*\*  $p < 0.05$ , \*\*\*  $p < 0.01$  Standard errors in parentheses. Outcome is  $\ln(\text{employed at work in [occupation type]}/\text{population})$ . Interaction coefficients are relative to Q1 2019. Essential jobs are based on DHS's "Identifying Critical Infrastructure During COVID-19" guidelines. Our definition of teleworkable jobs comes from Dingel and Neiman 2020. Frontline jobs are those that are essential and not teleworkable.

# Appendix B

Table B1. Logged Employment Outcome: Coefficients for Disability x Quarter Interactions for Employed At Work, By Reference Quarter

|                    | Reference Quarter   |                     |                     |                      |                      |                      |                      |                      |                       |
|--------------------|---------------------|---------------------|---------------------|----------------------|----------------------|----------------------|----------------------|----------------------|-----------------------|
|                    | (1)                 | (2)                 | (3)                 | (4)                  | (5)                  | (6)                  | (7)                  | (8)                  | (9)                   |
|                    | Q1 18               | Q2 18               | Q3 18               | Q4 18                | Q1 19                | Q2 19                | Q3 19                | Q4 19                | Q1 20                 |
| Disabled × Q1 2020 | 0.00849<br>(0.0330) | 0.0364<br>(0.0472)  | 0.0383<br>(0.0418)  | 0.00386<br>(0.0286)  | 0.0302<br>(0.0196)   | 0.0384*<br>(0.0223)  | -0.0105<br>(0.0294)  | 0.0489*<br>(0.0253)  |                       |
| Disabled × Q2 2020 | -0.0239<br>(0.0848) | 0.00397<br>(0.0985) | 0.00592<br>(0.0883) | -0.0286<br>(0.0831)  | -0.00226<br>(0.0724) | 0.00598<br>(0.0741)  | -0.0429<br>(0.0773)  | 0.0165<br>(0.0652)   | -0.0324<br>(0.0640)   |
| Disabled × Q3 2020 | -0.0653<br>(0.0660) | -0.0374<br>(0.0799) | -0.0355<br>(0.0707) | -0.0700<br>(0.0638)  | -0.0437<br>(0.0510)  | -0.0354<br>(0.0531)  | -0.0843<br>(0.0580)  | -0.0249<br>(0.0472)  | -0.0738*<br>(0.0439)  |
| Disabled × Q4 2020 | -0.0241<br>(0.0336) | 0.00380<br>(0.0500) | 0.00574<br>(0.0392) | -0.0287<br>(0.0311)  | -0.00244<br>(0.0254) | 0.00580<br>(0.0254)  | -0.0431<br>(0.0292)  | 0.0163<br>(0.0228)   | -0.0326*<br>(0.0194)  |
| Disabled × Q1 2021 | -0.0240<br>(0.0559) | 0.00387<br>(0.0704) | 0.00581<br>(0.0612) | -0.0287<br>(0.0525)  | -0.00237<br>(0.0413) | 0.00587<br>(0.0440)  | -0.0430<br>(0.0475)  | 0.0164<br>(0.0368)   | -0.0325<br>(0.0321)   |
| Disabled × Q2 2021 | -0.0160<br>(0.0463) | 0.0119<br>(0.0601)  | 0.0139<br>(0.0532)  | -0.0206<br>(0.0426)  | 0.00570<br>(0.0326)  | 0.0139<br>(0.0333)   | -0.0349<br>(0.0400)  | 0.0245<br>(0.0310)   | -0.0245<br>(0.0258)   |
| Disabled × Q3 2021 | 0.0328<br>(0.0569)  | 0.0607<br>(0.0686)  | 0.0626<br>(0.0622)  | 0.0282<br>(0.0550)   | 0.0545<br>(0.0497)   | 0.0627<br>(0.0494)   | 0.0138<br>(0.0526)   | 0.0732<br>(0.0464)   | 0.0243<br>(0.0448)    |
| Disabled × Q4 2021 | 0.0716<br>(0.0528)  | 0.0995<br>(0.0664)  | 0.101*<br>(0.0599)  | 0.0670<br>(0.0504)   | 0.0933**<br>(0.0380) | 0.102**<br>(0.0401)  | 0.0527<br>(0.0457)   | 0.112***<br>(0.0375) | 0.0631**<br>(0.0292)  |
| Disabled × Q1 2022 | 0.0752<br>(0.0535)  | 0.103<br>(0.0648)   | 0.105*<br>(0.0617)  | 0.0706<br>(0.0512)   | 0.0969**<br>(0.0400) | 0.105**<br>(0.0455)  | 0.0563<br>(0.0486)   | 0.116***<br>(0.0437) | 0.0667*<br>(0.0377)   |
| Disabled × Q2 2022 | 0.103**<br>(0.0417) | 0.130**<br>(0.0542) | 0.132**<br>(0.0511) | 0.0979**<br>(0.0381) | 0.124***<br>(0.0278) | 0.132***<br>(0.0301) | 0.0836**<br>(0.0370) | 0.143***<br>(0.0323) | 0.0940***<br>(0.0227) |
| Observations       | 240                 | 240                 | 240                 | 240                  | 240                  | 240                  | 240                  | 240                  | 240                   |

\*  $p < 0.10$ , \*\*  $p < 0.05$ , \*\*\*  $p < 0.01$  Standard errors in parentheses. Outcome is  $\ln(\text{employed at work}/\text{population})$ . Interaction coefficients are relative to Q1 2019. Models include demographic controls for age, gender, race, and education attainment of Bachelor's degree and are weighted by working age (18-64) population size, as calculated from CPS data.

Table B2. Logged Employment Outcome: Coefficients for Disability x Quarter Interactions for Essential, By Reference Quarter

|                    | Reference Quarter   |                      |                     |                      |                      |                      |                       |                      |                       |  |
|--------------------|---------------------|----------------------|---------------------|----------------------|----------------------|----------------------|-----------------------|----------------------|-----------------------|--|
|                    | (1)                 | (2)                  | (3)                 | (4)                  | (5)                  | (6)                  | (7)                   | (8)                  | (9)                   |  |
|                    | Q1 18               | Q2 18                | Q3 18               | Q4 18                | Q1 19                | Q2 19                | Q3 19                 | Q4 19                | Q1 20                 |  |
| Disabled × Q1 2020 | -0.0397<br>(0.0339) | -0.0102<br>(0.0471)  | -0.0187<br>(0.0465) | -0.0323<br>(0.0296)  | -0.00919<br>(0.0218) | -0.00556<br>(0.0249) | -0.0757**<br>(0.0328) | 0.0282<br>(0.0385)   |                       |  |
| Disabled × Q2 2020 | -0.0651<br>(0.0777) | -0.0356<br>(0.0911)  | -0.0441<br>(0.0827) | -0.0577<br>(0.0754)  | -0.0346<br>(0.0649)  | -0.0309<br>(0.0684)  | -0.101<br>(0.0707)    | 0.00279<br>(0.0636)  | -0.0254<br>(0.0571)   |  |
| Disabled × Q3 2020 | -0.0753<br>(0.0659) | -0.0458<br>(0.0790)  | -0.0542<br>(0.0728) | -0.0679<br>(0.0640)  | -0.0448<br>(0.0514)  | -0.0411<br>(0.0543)  | -0.111*<br>(0.0595)   | -0.00739<br>(0.0554) | -0.0356<br>(0.0454)   |  |
| Disabled × Q4 2020 | -0.0327<br>(0.0370) | -0.00321<br>(0.0522) | -0.0116<br>(0.0441) | -0.0253<br>(0.0347)  | -0.00215<br>(0.0309) | 0.00148<br>(0.0312)  | -0.0686**<br>(0.0342) | 0.0352<br>(0.0387)   | 0.00704<br>(0.0244)   |  |
| Disabled × Q1 2021 | -0.0556<br>(0.0541) | -0.0262<br>(0.0683)  | -0.0346<br>(0.0612) | -0.0482<br>(0.0503)  | -0.0251<br>(0.0403)  | -0.0215<br>(0.0451)  | -0.0916*<br>(0.0470)  | 0.0123<br>(0.0429)   | -0.0159<br>(0.0317)   |  |
| Disabled × Q2 2021 | -0.0417<br>(0.0465) | -0.0123<br>(0.0596)  | -0.0207<br>(0.0574) | -0.0343<br>(0.0430)  | -0.0112<br>(0.0343)  | -0.00756<br>(0.0356) | -0.0777*<br>(0.0425)  | 0.0262<br>(0.0421)   | -0.00201<br>(0.0283)  |  |
| Disabled × Q3 2021 | 0.0394<br>(0.0570)  | 0.0689<br>(0.0681)   | 0.0604<br>(0.0659)  | 0.0468<br>(0.0554)   | 0.0699<br>(0.0509)   | 0.0735<br>(0.0518)   | 0.00344<br>(0.0546)   | 0.107*<br>(0.0554)   | 0.0791*<br>(0.0469)   |  |
| Disabled × Q4 2021 | 0.0579<br>(0.0519)  | 0.0874<br>(0.0646)   | 0.0790<br>(0.0631)  | 0.0653<br>(0.0498)   | 0.0885**<br>(0.0378) | 0.0921**<br>(0.0414) | 0.0220<br>(0.0472)    | 0.126***<br>(0.0471) | 0.0976***<br>(0.0304) |  |
| Disabled × Q1 2022 | 0.0751<br>(0.0613)  | 0.105<br>(0.0710)    | 0.0962<br>(0.0729)  | 0.0825<br>(0.0595)   | 0.106**<br>(0.0495)  | 0.109*<br>(0.0563)   | 0.0392<br>(0.0581)    | 0.143**<br>(0.0583)  | 0.115**<br>(0.0476)   |  |
| Disabled × Q2 2022 | 0.110**<br>(0.0431) | 0.140**<br>(0.0544)  | 0.131**<br>(0.0569) | 0.118***<br>(0.0396) | 0.141***<br>(0.0300) | 0.145***<br>(0.0335) | 0.0744*<br>(0.0405)   | 0.178***<br>(0.0432) | 0.150***<br>(0.0251)  |  |
| Observations       | 240                 | 240                  | 240                 | 240                  | 240                  | 240                  | 240                   | 240                  | 240                   |  |

\*  $p < 0.10$ , \*\*  $p < 0.05$ , \*\*\*  $p < 0.01$  Standard errors in parentheses. Outcome is  $\ln(\text{employed at work in essential job/population})$ . Interaction coefficients are relative to Q1 2019. Models include demographic controls for age, gender, race, and education attainment of Bachelor's degree and are weighted by working age (18-64) population size, as calculated from CPS data.

Table B3. Logged Employment Outcome: Coefficients for Disability x Quarter Interactions for Non-Essential, By Reference Quarter

|                    | Reference Quarter    |                     |                      |                      |                      |                      |                      |                       |                       |
|--------------------|----------------------|---------------------|----------------------|----------------------|----------------------|----------------------|----------------------|-----------------------|-----------------------|
|                    | (1)                  | (2)                 | (3)                  | (4)                  | (5)                  | (6)                  | (7)                  | (8)                   | (9)                   |
|                    | Q1 18                | Q2 18               | Q3 18                | Q4 18                | Q1 19                | Q2 19                | Q3 19                | Q4 19                 | Q1 20                 |
| Disabled × Q1 2020 | 0.121***<br>(0.0408) | 0.144**<br>(0.0600) | 0.175***<br>(0.0546) | 0.0883**<br>(0.0400) | 0.123***<br>(0.0319) | 0.143***<br>(0.0285) | 0.147***<br>(0.0327) | 0.0983***<br>(0.0367) |                       |
| Disabled × Q2 2020 | 0.0668<br>(0.114)    | 0.0900<br>(0.132)   | 0.121<br>(0.122)     | 0.0342<br>(0.115)    | 0.0684<br>(0.102)    | 0.0885<br>(0.102)    | 0.0931<br>(0.105)    | 0.0441<br>(0.0919)    | -0.0542<br>(0.0890)   |
| Disabled × Q3 2020 | -0.0485<br>(0.0791)  | -0.0253<br>(0.0977) | 0.00553<br>(0.0889)  | -0.0812<br>(0.0799)  | -0.0469<br>(0.0652)  | -0.0268<br>(0.0636)  | -0.0222<br>(0.0681)  | -0.0712<br>(0.0579)   | -0.169***<br>(0.0499) |
| Disabled × Q4 2020 | -0.0137<br>(0.0474)  | 0.00956<br>(0.0660) | 0.0404<br>(0.0589)   | -0.0463<br>(0.0483)  | -0.0121<br>(0.0427)  | 0.00807<br>(0.0377)  | 0.0127<br>(0.0410)   | -0.0363<br>(0.0400)   | -0.135***<br>(0.0315) |
| Disabled × Q1 2021 | 0.0470<br>(0.0748)   | 0.0703<br>(0.0928)  | 0.101<br>(0.0849)    | 0.0144<br>(0.0732)   | 0.0486<br>(0.0608)   | 0.0688<br>(0.0599)   | 0.0734<br>(0.0630)   | 0.0244<br>(0.0552)    | -0.0739*<br>(0.0446)  |
| Disabled × Q2 2021 | 0.0440<br>(0.0594)   | 0.0672<br>(0.0774)  | 0.0981<br>(0.0698)   | 0.0114<br>(0.0588)   | 0.0456<br>(0.0486)   | 0.0658<br>(0.0443)   | 0.0703<br>(0.0484)   | 0.0214<br>(0.0461)    | -0.0769**<br>(0.0344) |
| Disabled × Q3 2021 | 0.0163<br>(0.0672)   | 0.0396<br>(0.0847)  | 0.0704<br>(0.0776)   | -0.0163<br>(0.0680)  | 0.0180<br>(0.0603)   | 0.0381<br>(0.0571)   | 0.0427<br>(0.0593)   | -0.00629<br>(0.0571)  | -0.105**<br>(0.0499)  |
| Disabled × Q4 2021 | 0.102<br>(0.0689)    | 0.125<br>(0.0874)   | 0.156*<br>(0.0804)   | 0.0693<br>(0.0697)   | 0.103*<br>(0.0556)   | 0.124**<br>(0.0537)  | 0.128**<br>(0.0571)  | 0.0792<br>(0.0523)    | -0.0191<br>(0.0389)   |
| Disabled × Q1 2022 | 0.0727<br>(0.0646)   | 0.0959<br>(0.0813)  | 0.127<br>(0.0773)    | 0.0401<br>(0.0654)   | 0.0743<br>(0.0524)   | 0.0945*<br>(0.0550)  | 0.0990*<br>(0.0556)  | 0.0501<br>(0.0530)    | -0.0482<br>(0.0438)   |
| Disabled × Q2 2022 | 0.0770<br>(0.0599)   | 0.100<br>(0.0752)   | 0.131*<br>(0.0705)   | 0.0444<br>(0.0591)   | 0.0787<br>(0.0512)   | 0.0988**<br>(0.0468) | 0.103**<br>(0.0502)  | 0.0544<br>(0.0531)    | -0.0439<br>(0.0411)   |
| Observations       | 240                  | 240                 | 240                  | 240                  | 240                  | 240                  | 240                  | 240                   | 240                   |

\*  $p < 0.10$ , \*\*  $p < 0.05$ , \*\*\*  $p < 0.01$  Standard errors in parentheses. Outcome is  $\ln(\text{employed at work in non-essential job}/\text{population})$ . Interaction coefficients are relative to Q1 2019. Models include demographic controls for age, gender, race, and education attainment of Bachelor's degree and are weighted by working age (18-64) population size, as calculated from CPS data.

Table B4. Logged Employment Outcome: Coefficients for Disability x Quarter Interactions for Teleworkable, By Reference Quarter

|                    | Reference Quarter    |                      |                      |                      |                      |                      |                      |                       |                      |
|--------------------|----------------------|----------------------|----------------------|----------------------|----------------------|----------------------|----------------------|-----------------------|----------------------|
|                    | (1)                  | (2)                  | (3)                  | (4)                  | (5)                  | (6)                  | (7)                  | (8)                   | (9)                  |
|                    | Q1 18                | Q2 18                | Q3 18                | Q4 18                | Q1 19                | Q2 19                | Q3 19                | Q4 19                 | Q1 20                |
| Disabled × Q1 2020 | 0.0173<br>(0.0439)   | 0.0952<br>(0.0688)   | 0.0884<br>(0.0593)   | 0.0714**<br>(0.0350) | 0.0554**<br>(0.0240) | 0.0795**<br>(0.0323) | 0.0575<br>(0.0427)   | 0.126***<br>(0.0290)  |                      |
| Disabled × Q2 2020 | 0.0182<br>(0.0816)   | 0.0961<br>(0.105)    | 0.0893<br>(0.0850)   | 0.0723<br>(0.0743)   | 0.0562<br>(0.0617)   | 0.0803<br>(0.0714)   | 0.0583<br>(0.0729)   | 0.127**<br>(0.0500)   | 0.000873<br>(0.0520) |
| Disabled × Q3 2020 | -0.0235<br>(0.0726)  | 0.0544<br>(0.0969)   | 0.0475<br>(0.0797)   | 0.0306<br>(0.0675)   | 0.0145<br>(0.0519)   | 0.0386<br>(0.0588)   | 0.0166<br>(0.0664)   | 0.0852*<br>(0.0440)   | -0.0409<br>(0.0451)  |
| Disabled × Q4 2020 | -0.0125<br>(0.0569)  | 0.0654<br>(0.0833)   | 0.0586<br>(0.0582)   | 0.0416<br>(0.0512)   | 0.0255<br>(0.0480)   | 0.0496<br>(0.0499)   | 0.0276<br>(0.0524)   | 0.0962***<br>(0.0315) | -0.0298<br>(0.0339)  |
| Disabled × Q1 2021 | 0.0251<br>(0.0684)   | 0.103<br>(0.0923)    | 0.0962<br>(0.0727)   | 0.0793<br>(0.0603)   | 0.0632<br>(0.0510)   | 0.0873<br>(0.0598)   | 0.0653<br>(0.0609)   | 0.134***<br>(0.0394)  | 0.00784<br>(0.0395)  |
| Disabled × Q2 2021 | 0.0409<br>(0.0545)   | 0.119<br>(0.0783)    | 0.112<br>(0.0677)    | 0.0950**<br>(0.0453) | 0.0789**<br>(0.0345) | 0.103***<br>(0.0393) | 0.0810<br>(0.0502)   | 0.150***<br>(0.0320)  | 0.0236<br>(0.0259)   |
| Disabled × Q3 2021 | 0.0924<br>(0.0652)   | 0.170**<br>(0.0856)  | 0.163**<br>(0.0785)  | 0.147**<br>(0.0599)  | 0.130**<br>(0.0559)  | 0.155**<br>(0.0613)  | 0.133**<br>(0.0644)  | 0.201***<br>(0.0555)  | 0.0751<br>(0.0526)   |
| Disabled × Q4 2021 | 0.143**<br>(0.0611)  | 0.221***<br>(0.0826) | 0.214***<br>(0.0764) | 0.197***<br>(0.0560) | 0.181***<br>(0.0408) | 0.205***<br>(0.0503) | 0.183***<br>(0.0577) | 0.252***<br>(0.0459)  | 0.126***<br>(0.0329) |
| Disabled × Q1 2022 | 0.177***<br>(0.0656) | 0.255***<br>(0.0846) | 0.248***<br>(0.0880) | 0.231***<br>(0.0636) | 0.215***<br>(0.0467) | 0.239***<br>(0.0645) | 0.217***<br>(0.0658) | 0.286***<br>(0.0605)  | 0.160***<br>(0.0486) |
| Disabled × Q2 2022 | 0.148***<br>(0.0565) | 0.226***<br>(0.0751) | 0.219***<br>(0.0745) | 0.202***<br>(0.0497) | 0.186***<br>(0.0383) | 0.210***<br>(0.0455) | 0.188***<br>(0.0549) | 0.257***<br>(0.0484)  | 0.131***<br>(0.0316) |
| Observations       | 240                  | 240                  | 240                  | 240                  | 240                  | 240                  | 240                  | 240                   | 240                  |

\*  $p < 0.10$ , \*\*  $p < 0.05$ , \*\*\*  $p < 0.01$  Standard errors in parentheses. Outcome is  $\ln(\text{employed at work in teleworkable job}/\text{population})$ . Interaction coefficients are relative to Q1 2019. Models include demographic controls for age, gender, race, and education attainment of Bachelor's degree and are weighted by working age (18-64) population size, as calculated from CPS data.

Table B5. Logged Employment Outcome: Coefficients for Disability x Quarter Interactions for Non-Teleworkable, By Reference Quarter

|                    | Reference Quarter   |                     |                     |                      |                      |                      |                       |                      |                       |
|--------------------|---------------------|---------------------|---------------------|----------------------|----------------------|----------------------|-----------------------|----------------------|-----------------------|
|                    | (1)                 | (2)                 | (3)                 | (4)                  | (5)                  | (6)                  | (7)                   | (8)                  | (9)                   |
|                    | Q1 18               | Q2 18               | Q3 18               | Q4 18                | Q1 19                | Q2 19                | Q3 19                 | Q4 19                | Q1 20                 |
| Disabled × Q1 2020 | -0.0106<br>(0.0416) | -0.0105<br>(0.0569) | 0.00531<br>(0.0498) | -0.0448<br>(0.0408)  | 0.00440<br>(0.0294)  | 0.0124<br>(0.0326)   | -0.0553*<br>(0.0321)  | -0.00622<br>(0.0341) |                       |
| Disabled × Q2 2020 | -0.0569<br>(0.123)  | -0.0568<br>(0.139)  | -0.0410<br>(0.127)  | -0.0911<br>(0.124)   | -0.0419<br>(0.111)   | -0.0339<br>(0.111)   | -0.102<br>(0.113)     | -0.0525<br>(0.0985)  | -0.0463<br>(0.0984)   |
| Disabled × Q3 2020 | -0.0882<br>(0.0855) | -0.0882<br>(0.102)  | -0.0723<br>(0.0910) | -0.122<br>(0.0862)   | -0.0733<br>(0.0703)  | -0.0652<br>(0.0708)  | -0.133*<br>(0.0724)   | -0.0839<br>(0.0609)  | -0.0777<br>(0.0567)   |
| Disabled × Q4 2020 | -0.0333<br>(0.0464) | -0.0333<br>(0.0627) | -0.0174<br>(0.0526) | -0.0675<br>(0.0473)  | -0.0183<br>(0.0380)  | -0.0103<br>(0.0396)  | -0.0781**<br>(0.0367) | -0.0290<br>(0.0341)  | -0.0227<br>(0.0308)   |
| Disabled × Q1 2021 | -0.0511<br>(0.0737) | -0.0511<br>(0.0903) | -0.0353<br>(0.0803) | -0.0854<br>(0.0727)  | -0.0362<br>(0.0584)  | -0.0281<br>(0.0600)  | -0.0959<br>(0.0598)   | -0.0468<br>(0.0506)  | -0.0406<br>(0.0432)   |
| Disabled × Q2 2021 | -0.0472<br>(0.0614) | -0.0471<br>(0.0771) | -0.0313<br>(0.0677) | -0.0814<br>(0.0613)  | -0.0322<br>(0.0480)  | -0.0242<br>(0.0479)  | -0.0919*<br>(0.0494)  | -0.0428<br>(0.0431)  | -0.0366<br>(0.0371)   |
| Disabled × Q3 2021 | -0.0110<br>(0.0697) | -0.0110<br>(0.0853) | 0.00483<br>(0.0757) | -0.0453<br>(0.0711)  | 0.00392<br>(0.0609)  | 0.0120<br>(0.0597)   | -0.0558<br>(0.0600)   | -0.00670<br>(0.0532) | -0.000484<br>(0.0507) |
| Disabled × Q4 2021 | 0.0249<br>(0.0718)  | 0.0250<br>(0.0881)  | 0.0408<br>(0.0787)  | -0.00928<br>(0.0725) | 0.0399<br>(0.0570)   | 0.0479<br>(0.0573)   | -0.0198<br>(0.0586)   | 0.0293<br>(0.0507)   | 0.0355<br>(0.0424)    |
| Disabled × Q1 2022 | 0.00622<br>(0.0661) | 0.00626<br>(0.0797) | 0.0221<br>(0.0726)  | -0.0280<br>(0.0659)  | 0.0212<br>(0.0532)   | 0.0292<br>(0.0563)   | -0.0386<br>(0.0550)   | 0.0106<br>(0.0506)   | 0.0168<br>(0.0459)    |
| Disabled × Q2 2022 | 0.0586<br>(0.0511)  | 0.0586<br>(0.0658)  | 0.0745<br>(0.0588)  | 0.0244<br>(0.0495)   | 0.0736**<br>(0.0365) | 0.0816**<br>(0.0381) | 0.0138<br>(0.0384)    | 0.0629*<br>(0.0378)  | 0.0692**<br>(0.0278)  |
| Observations       | 240                 | 240                 | 240                 | 240                  | 240                  | 240                  | 240                   | 240                  | 240                   |

\*  $p < 0.10$ , \*\*  $p < 0.05$ , \*\*\*  $p < 0.01$  Standard errors in parentheses. Outcome is  $\ln(\text{employed at work in non-teleworkable job}/\text{population})$ . Interaction coefficients are relative to Q1 2019. Models include demographic controls for age, gender, race, and education attainment of Bachelor's degree and are weighted by working age (18-64) population size, as calculated from CPS data.

Table B6. Logged Employment Outcome: Coefficients for Disability x Quarter Interactions for Frontline, By Reference Quarter

|                    | Reference Quarter     |                      |                     |                       |                      |                       |                       |                     |                      |
|--------------------|-----------------------|----------------------|---------------------|-----------------------|----------------------|-----------------------|-----------------------|---------------------|----------------------|
|                    | (1)                   | (2)                  | (3)                 | (4)                   | (5)                  | (6)                   | (7)                   | (8)                 | (9)                  |
|                    | Q1 18                 | Q2 18                | Q3 18               | Q4 18                 | Q1 19                | Q2 19                 | Q3 19                 | Q4 19               | Q1 20                |
| Disabled × Q1 2020 | -0.0573<br>(0.0395)   | -0.0614<br>(0.0501)  | -0.0468<br>(0.0428) | -0.0832**<br>(0.0387) | -0.0326<br>(0.0313)  | -0.0262<br>(0.0384)   | -0.115***<br>(0.0313) | -0.0510<br>(0.0408) |                      |
| Disabled × Q2 2020 | -0.105<br>(0.0998)    | -0.109<br>(0.113)    | -0.0941<br>(0.102)  | -0.130<br>(0.101)     | -0.0799<br>(0.0904)  | -0.0735<br>(0.0934)   | -0.162*<br>(0.0906)   | -0.0983<br>(0.0816) | -0.0473<br>(0.0797)  |
| Disabled × Q3 2020 | -0.110<br>(0.0756)    | -0.114<br>(0.0878)   | -0.0995<br>(0.0771) | -0.136*<br>(0.0757)   | -0.0853<br>(0.0631)  | -0.0789<br>(0.0664)   | -0.168***<br>(0.0635) | -0.104*<br>(0.0586) | -0.0527<br>(0.0523)  |
| Disabled × Q4 2020 | -0.0460<br>(0.0491)   | -0.0501<br>(0.0601)  | -0.0355<br>(0.0485) | -0.0719<br>(0.0487)   | -0.0213<br>(0.0441)  | -0.0149<br>(0.0489)   | -0.103**<br>(0.0401)  | -0.0397<br>(0.0440) | 0.0113<br>(0.0377)   |
| Disabled × Q1 2021 | -0.0808<br>(0.0638)   | -0.0849<br>(0.0765)  | -0.0703<br>(0.0657) | -0.107*<br>(0.0622)   | -0.0561<br>(0.0520)  | -0.0497<br>(0.0578)   | -0.138***<br>(0.0510) | -0.0745<br>(0.0477) | -0.0235<br>(0.0408)  |
| Disabled × Q2 2021 | -0.0643<br>(0.0549)   | -0.0683<br>(0.0658)  | -0.0538<br>(0.0565) | -0.0901*<br>(0.0534)  | -0.0396<br>(0.0444)  | -0.0331<br>(0.0477)   | -0.122***<br>(0.0431) | -0.0580<br>(0.0455) | -0.00696<br>(0.0375) |
| Disabled × Q3 2021 | -0.000841<br>(0.0602) | -0.00490<br>(0.0718) | 0.00969<br>(0.0634) | -0.0267<br>(0.0606)   | 0.0239<br>(0.0532)   | 0.0303<br>(0.0559)    | -0.0583<br>(0.0509)   | 0.00548<br>(0.0522) | 0.0565<br>(0.0454)   |
| Disabled × Q4 2021 | -0.00461<br>(0.0649)  | -0.00867<br>(0.0764) | 0.00592<br>(0.0682) | -0.0305<br>(0.0651)   | 0.0201<br>(0.0534)   | 0.0265<br>(0.0571)    | -0.0621<br>(0.0526)   | 0.00172<br>(0.0530) | 0.0527<br>(0.0423)   |
| Disabled × Q1 2022 | -0.0317<br>(0.0760)   | -0.0358<br>(0.0845)  | -0.0212<br>(0.0791) | -0.0576<br>(0.0754)   | -0.00696<br>(0.0676) | -0.000550<br>(0.0734) | -0.0892<br>(0.0663)   | -0.0254<br>(0.0680) | 0.0256<br>(0.0616)   |
| Disabled × Q2 2022 | 0.0503<br>(0.0479)    | 0.0462<br>(0.0579)   | 0.0608<br>(0.0510)  | 0.0244<br>(0.0456)    | 0.0750**<br>(0.0365) | 0.0814*<br>(0.0427)   | -0.00716<br>(0.0349)  | 0.0566<br>(0.0424)  | 0.108***<br>(0.0312) |
| Observations       | 240                   | 240                  | 240                 | 240                   | 240                  | 240                   | 240                   | 240                 | 240                  |

\*  $p < 0.10$ , \*\*  $p < 0.05$ , \*\*\*  $p < 0.01$  Standard errors in parentheses. Outcome is  $\ln(\text{employed at work in frontline job}/\text{population})$ . Interaction coefficients are relative to Q1 2019. Models include demographic controls for age, gender, race, and education attainment of Bachelor's degree and are weighted by working age (18-64) population size, as calculated from CPS data.

Table B7. Logged Employment Outcome: Coefficients for Disability x Quarter Interactions for Non-Frontline, By Reference Quarter

|                    | Reference Quarter |          |          |           |           |          |          |          |           |
|--------------------|-------------------|----------|----------|-----------|-----------|----------|----------|----------|-----------|
|                    | (1)               | (2)      | (3)      | (4)       | (5)       | (6)      | (7)      | (8)      | (9)       |
|                    | Q1 18             | Q2 18    | Q3 18    | Q4 18     | Q1 19     | Q2 19    | Q3 19    | Q4 19    | Q1 20     |
| Disabled × Q1 2020 | 0.0700*           | 0.131**  | 0.121**  | 0.0856*** | 0.0886*** | 0.100*** | 0.0919** | 0.142*** |           |
|                    | (0.0377)          | (0.0597) | (0.0539) | (0.0324)  | (0.0232)  | (0.0286) | (0.0396) | (0.0263) |           |
| Disabled × Q2 2020 | 0.0557            | 0.117    | 0.106    | 0.0713    | 0.0742    | 0.0859   | 0.0776   | 0.128**  | -0.0143   |
|                    | (0.0875)          | (0.107)  | (0.0921) | (0.0835)  | (0.0716)  | (0.0766) | (0.0807) | (0.0612) | (0.0622)  |
| Disabled × Q3 2020 | -0.0205           | 0.0405   | 0.0301   | -0.00491  | -0.00192  | 0.00975  | 0.00140  | 0.0516   | -0.0905*  |
|                    | (0.0705)          | (0.0906) | (0.0781) | (0.0672)  | (0.0530)  | (0.0576) | (0.0655) | (0.0468) | (0.0463)  |
| Disabled × Q4 2020 | 0.00101           | 0.0620   | 0.0516   | 0.0166    | 0.0196    | 0.0312   | 0.0229   | 0.0731** | -0.0690** |
|                    | (0.0474)          | (0.0699) | (0.0537) | (0.0439)  | (0.0412)  | (0.0421) | (0.0467) | (0.0287) | (0.0309)  |
| Disabled × Q1 2021 | 0.0339            | 0.0949   | 0.0844   | 0.0494    | 0.0524    | 0.0641   | 0.0557   | 0.106**  | -0.0361   |
|                    | (0.0654)          | (0.0855) | (0.0719) | (0.0598)  | (0.0498)  | (0.0551) | (0.0598) | (0.0406) | (0.0400)  |
| Disabled × Q2 2021 | 0.0326            | 0.0936   | 0.0832   | 0.0482    | 0.0512    | 0.0628*  | 0.0545   | 0.105*** | -0.0374   |
|                    | (0.0494)          | (0.0704) | (0.0629) | (0.0436)  | (0.0330)  | (0.0360) | (0.0473) | (0.0298) | (0.0256)  |
| Disabled × Q3 2021 | 0.0635            | 0.125    | 0.114    | 0.0791    | 0.0821    | 0.0937   | 0.0854   | 0.136*** | -0.00649  |
|                    | (0.0615)          | (0.0791) | (0.0727) | (0.0587)  | (0.0548)  | (0.0568) | (0.0619) | (0.0519) | (0.0512)  |
| Disabled × Q4 2021 | 0.143**           | 0.204**  | 0.193*** | 0.158***  | 0.161***  | 0.173*** | 0.165*** | 0.215*** | 0.0729**  |
|                    | (0.0601)          | (0.0785) | (0.0724) | (0.0571)  | (0.0436)  | (0.0489) | (0.0570) | (0.0446) | (0.0355)  |
| Disabled × Q1 2022 | 0.172***          | 0.233*** | 0.222*** | 0.187***  | 0.190***  | 0.202*** | 0.194*** | 0.244*** | 0.102**   |
|                    | (0.0606)          | (0.0772) | (0.0770) | (0.0590)  | (0.0441)  | (0.0561) | (0.0598) | (0.0521) | (0.0438)  |
| Disabled × Q2 2022 | 0.151***          | 0.212*** | 0.201*** | 0.166***  | 0.169***  | 0.181*** | 0.173*** | 0.223*** | 0.0807*** |
|                    | (0.0502)          | (0.0673) | (0.0668) | (0.0460)  | (0.0355)  | (0.0401) | (0.0501) | (0.0420) | (0.0299)  |
| Observations       | 240               | 240      | 240      | 240       | 240       | 240      | 240      | 240      | 240       |

\*  $p < 0.10$ , \*\*  $p < 0.05$ , \*\*\*  $p < 0.01$  Standard errors in parentheses. Outcome is  $\ln(\text{employed at work in non-frontline job/population})$ . Interaction coefficients are relative to Q1 2019. Models include demographic controls for age, gender, race, and education attainment of Bachelor's degree and are weighted by working age (18-64) population size, as calculated from CPS data.



# Appendix C

Figure C1

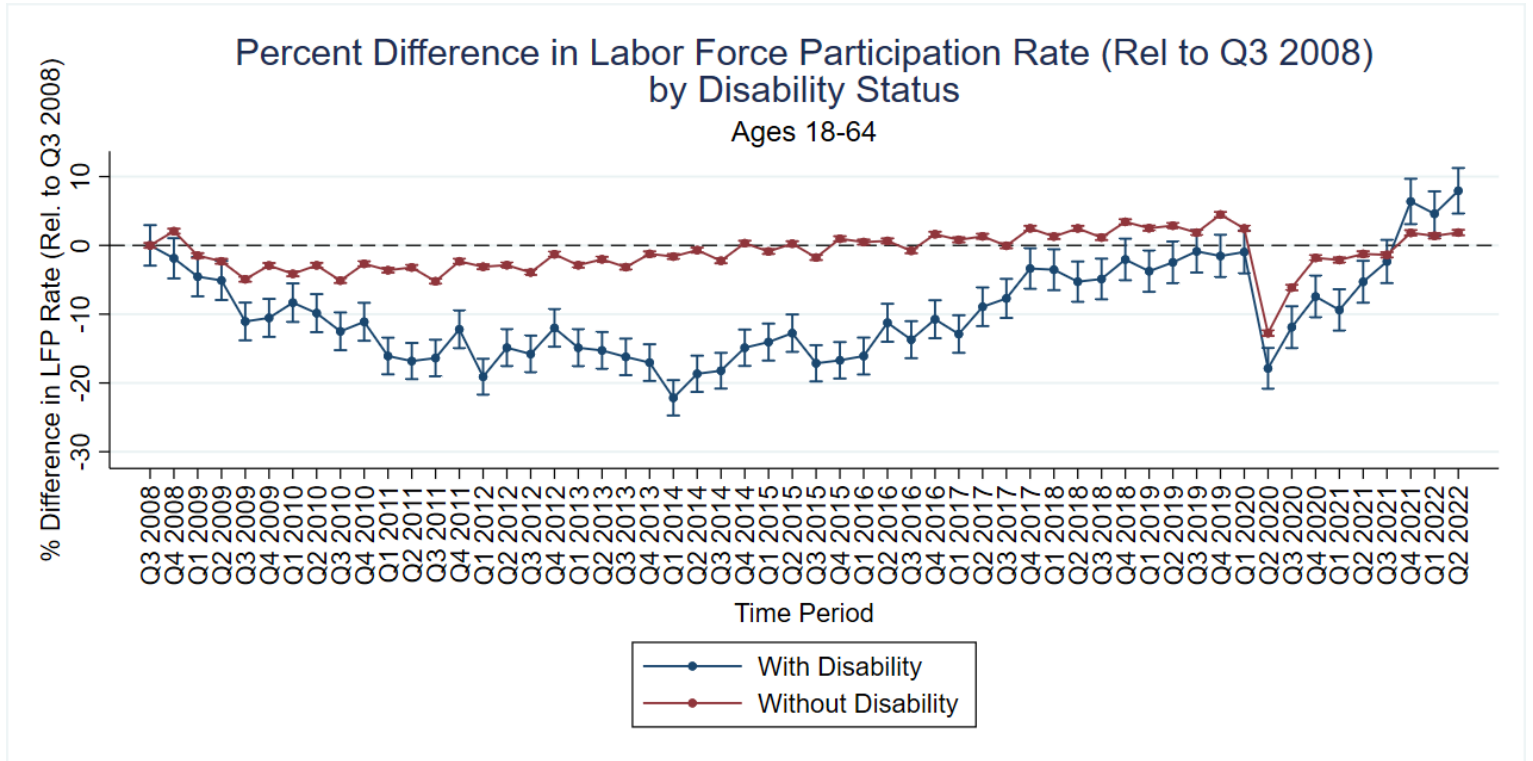

Figure C2

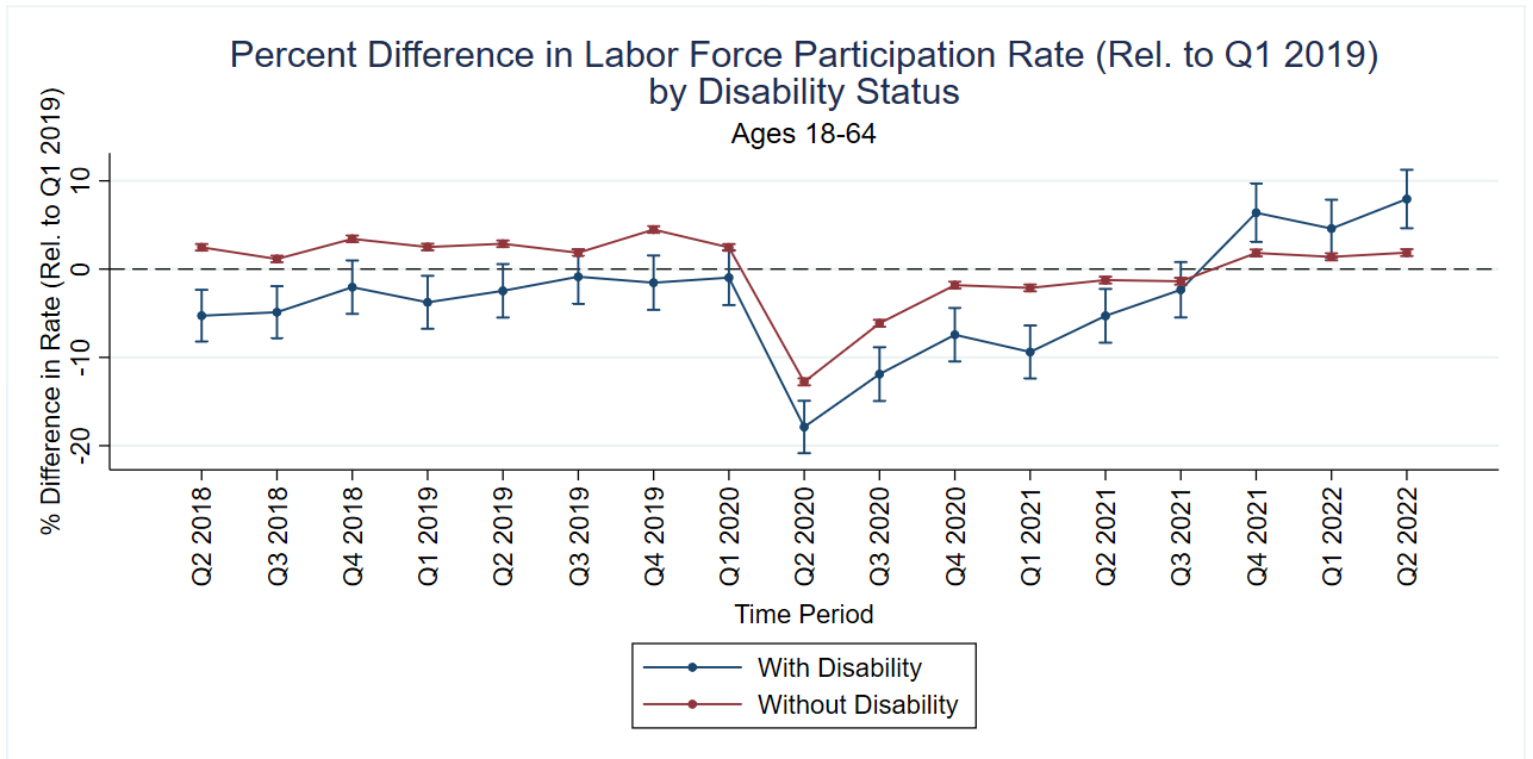

Table C1. Logged Labor Force Participation Outcome: Coefficients for Disability x Quarter Interactions

|                    |                       |
|--------------------|-----------------------|
| Disabled           | -0.512***<br>(0.0925) |
| Disabled × Q1 2020 | 0.00442<br>(0.0125)   |
| Disabled × Q2 2020 | 0.0288<br>(0.0246)    |
| Disabled × Q3 2020 | -0.0209<br>(0.0164)   |
| Disabled × Q4 2020 | -0.00111<br>(0.0121)  |
| Disabled × Q1 2021 | 0.000718<br>(0.0147)  |
| Disabled × Q2 2021 | 0.0119<br>(0.0183)    |
| Disabled × Q3 2021 | 0.0503**<br>(0.0221)  |
| Disabled × Q4 2021 | 0.0792***<br>(0.0169) |
| Disabled × Q1 2022 | 0.0703***<br>(0.0191) |
| Disabled × Q2 2022 | 0.0906***<br>(0.0179) |
| Constant           | -1.054***<br>(0.338)  |
| Observations       | 240                   |

\*  $p < 0.10$ , \*\*  $p < 0.05$ , \*\*\*  $p < 0.01$  Standard errors in parentheses. Outcome is  $\ln(\text{labor force participation rate})$ . Interaction coefficients are relative to Q1 2019. Models include demographic controls for age, gender, race, and education attainment of Bachelor's degree and are weighted by working age (18-64) population size, as calculated from CPS data.

# Appendix D

Figure D1

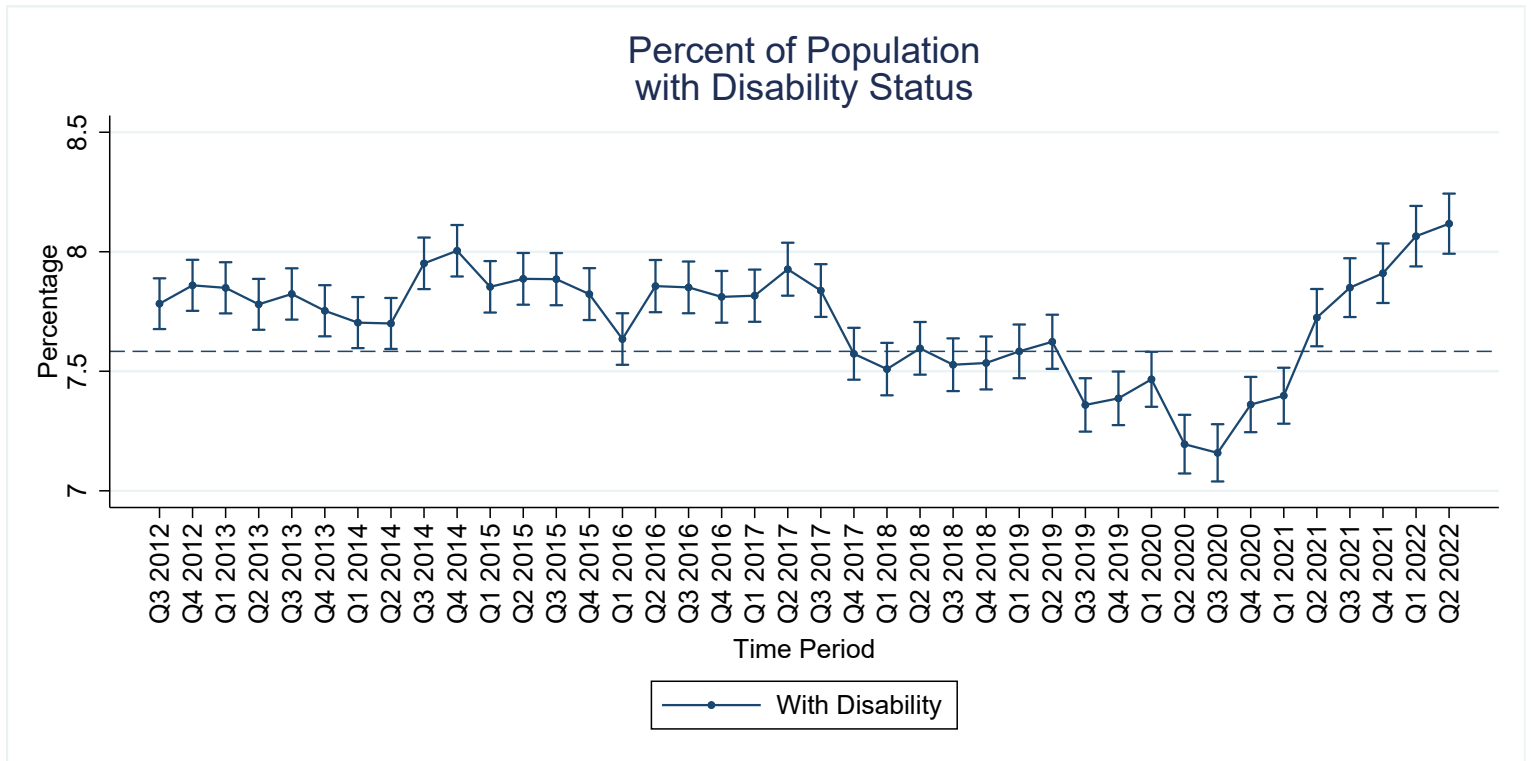

Figure D2

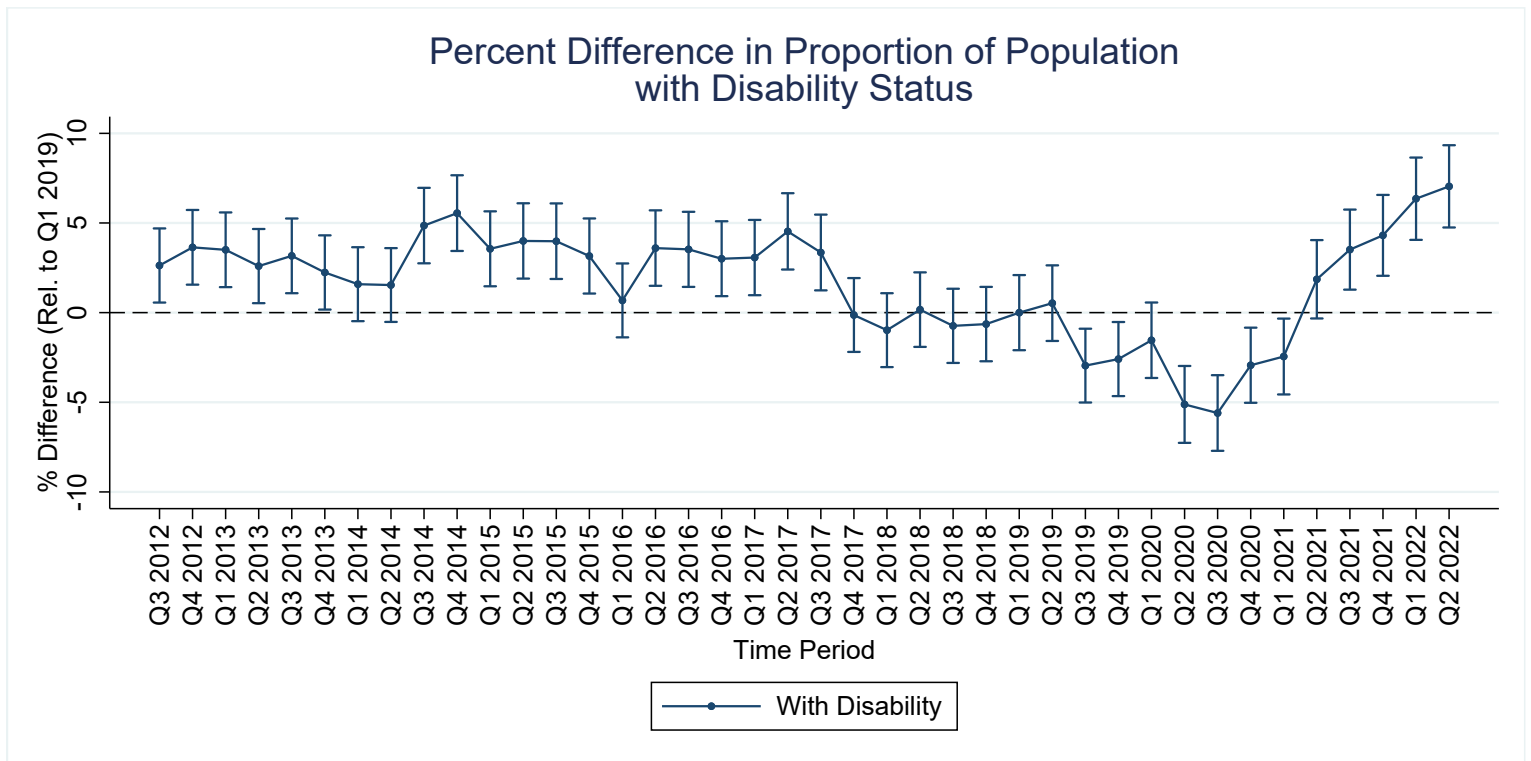

Figure D3

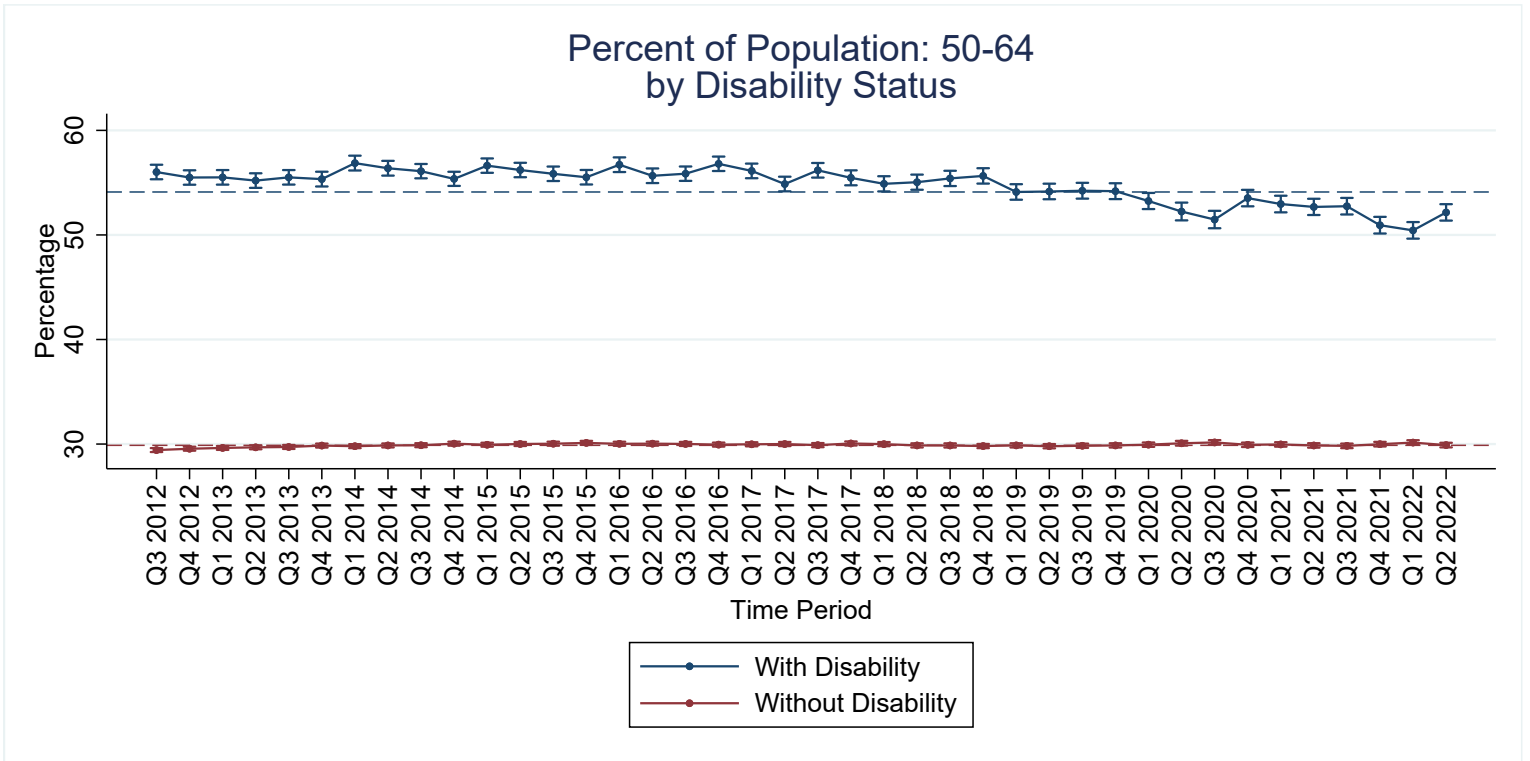

Figure D4

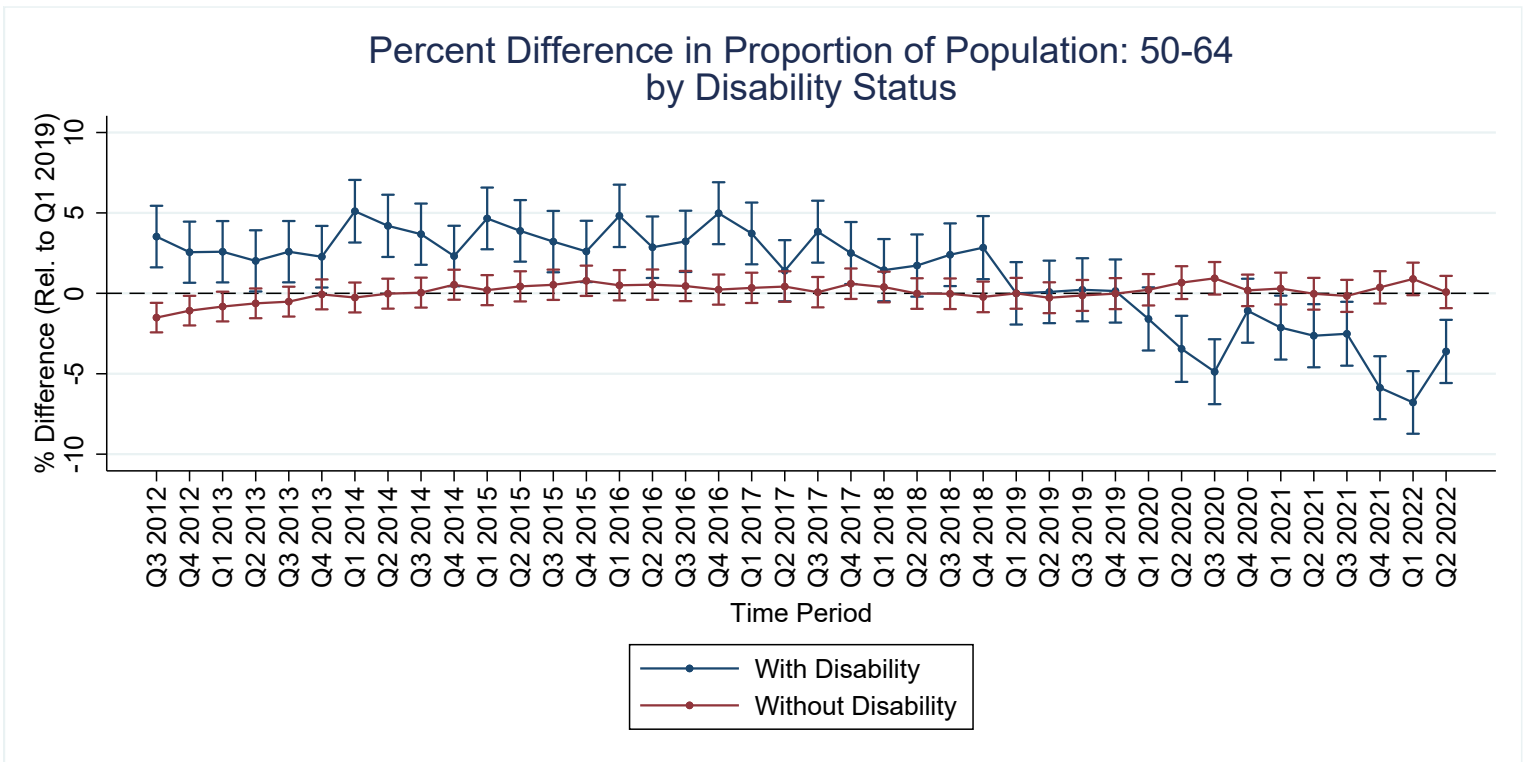

Figure D5

### Percent of Population: Male by Disability Status Ages 18-64

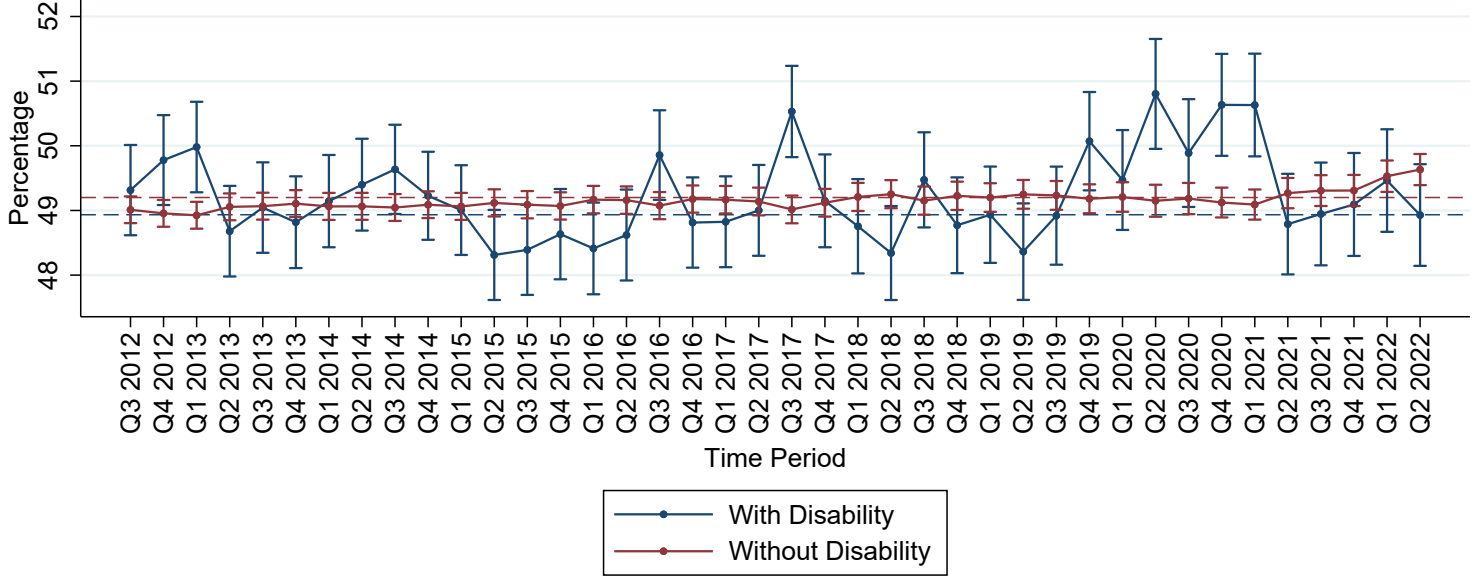

Figure D6

### Percent Difference in Proportion of Population: Male by Disability Status Ages 18-64

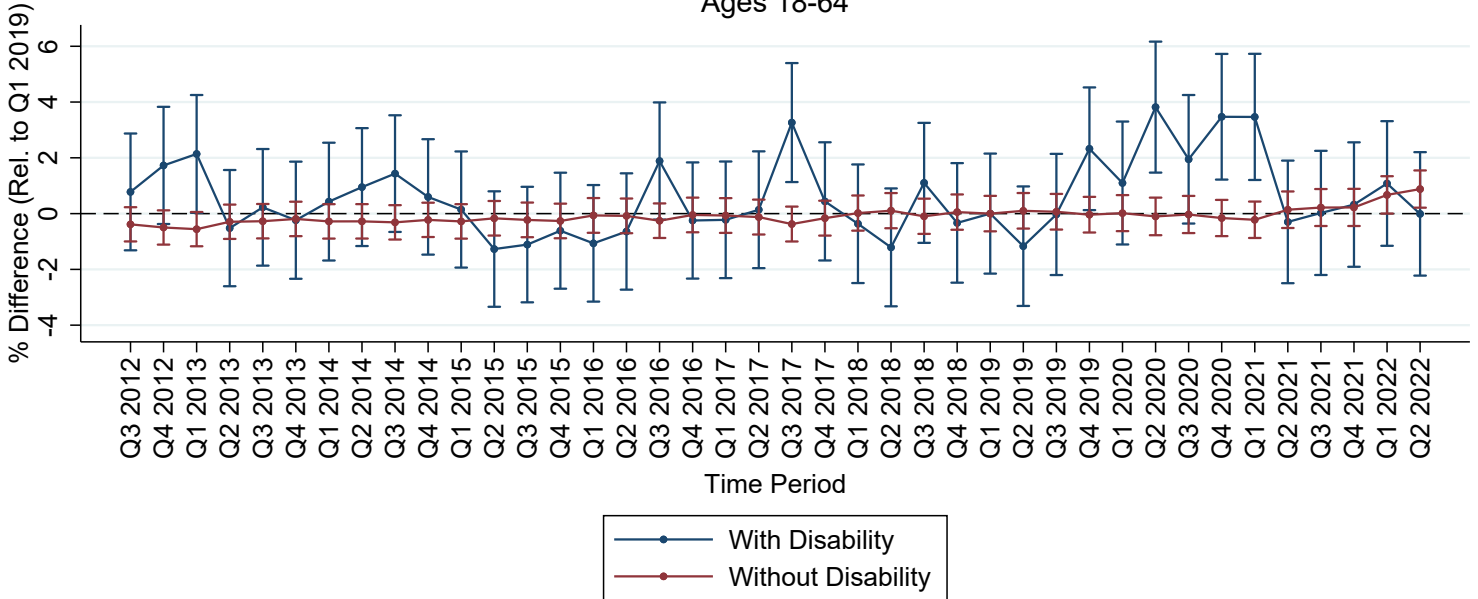

Figure D7

### Percent of Population: Hispanic by Disability Status Ages 18-64

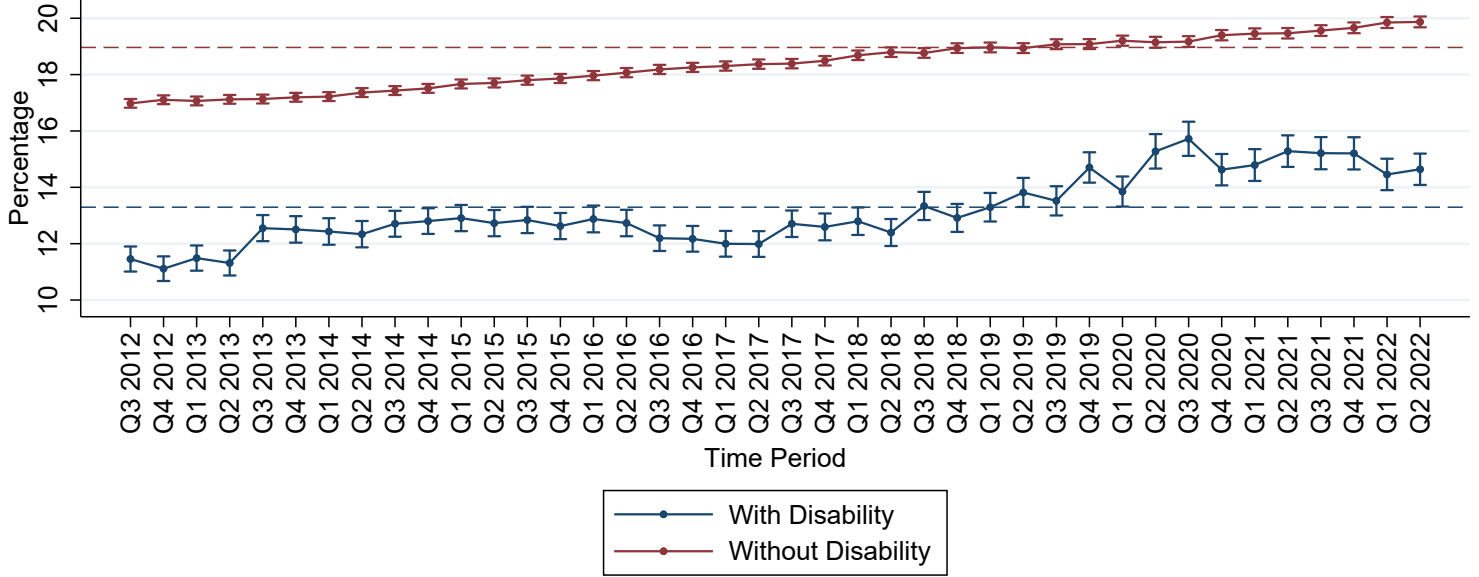

Figure D8

### Percent Difference in Proportion of Population: Hispanic by Disability Status Ages 18-64

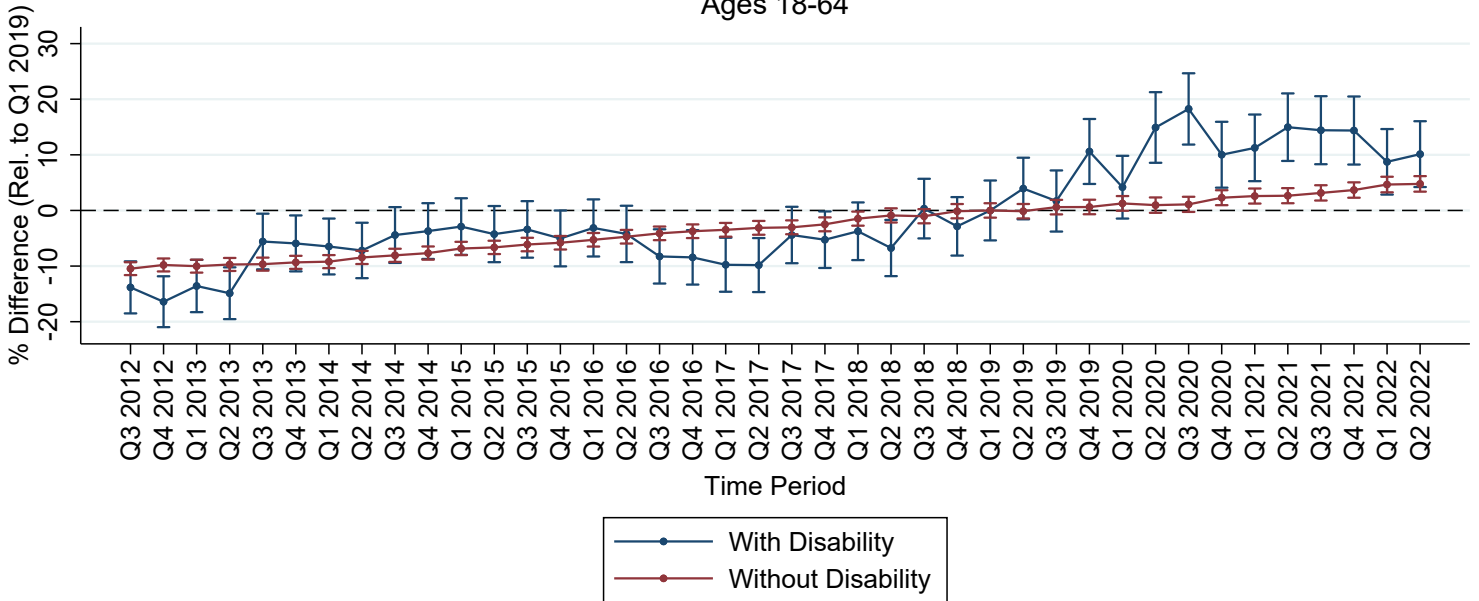

Table D1. Proportion of Sample with Disability Outcome: Quarter-Level Coefficients, By Disability Type

|              | (1)                       | (2)                       | (3)                        | (4)                       | (5)                       | (6)                      | (7)                        |
|--------------|---------------------------|---------------------------|----------------------------|---------------------------|---------------------------|--------------------------|----------------------------|
|              | Any                       | Hearing                   | Vision                     | Remembering               | Physical                  | Mobility                 | Personal Care              |
| Q2 2018      | 0.000127<br>(0.000744)    | -0.0000738<br>(0.000263)  | 0.000144<br>(0.000259)     | 0.0000542<br>(0.000389)   | 0.000481<br>(0.000489)    | -0.000311<br>(0.000440)  | 0.000572***<br>(0.000189)  |
| Q3 2018      | -0.000560<br>(0.000902)   | 0.00106***<br>(0.000271)  | -0.000370<br>(0.000261)    | -0.000786**<br>(0.000381) | -0.000663<br>(0.000477)   | 0.000358<br>(0.000442)   | 0.000607***<br>(0.000191)  |
| Q4 2018      | -0.000485<br>(0.000723)   | 0.000443<br>(0.000323)    | -0.000512**<br>(0.000216)  | -0.000914**<br>(0.000422) | -0.000751<br>(0.000463)   | -0.000110<br>(0.000423)  | 0.0000700<br>(0.000170)    |
| Q2 2019      | 0.000401<br>(0.000742)    | -0.000341<br>(0.000365)   | -0.000709***<br>(0.000255) | 0.000254<br>(0.000407)    | 0.0000355<br>(0.000458)   | 0.00119**<br>(0.000516)  | 0.000455**<br>(0.000213)   |
| Q3 2019      | -0.00224***<br>(0.000743) | -0.000602<br>(0.000429)   | -0.00136***<br>(0.000231)  | 0.000467<br>(0.000500)    | -0.00198***<br>(0.000468) | -0.000122<br>(0.000427)  | 0.000272<br>(0.000165)     |
| Q4 2019      | -0.00196**<br>(0.000967)  | -0.000922**<br>(0.000393) | -0.00136***<br>(0.000221)  | 0.00115**<br>(0.000436)   | -0.00180***<br>(0.000425) | 0.000731<br>(0.000486)   | 0.000238<br>(0.000163)     |
| Q1 2020      | -0.00117<br>(0.000820)    | 0.0000164<br>(0.000250)   | -0.000636***<br>(0.000240) | -1.66e-08<br>(0.000516)   | -0.00242***<br>(0.000463) | 0.000151<br>(0.000459)   | 0.0000900<br>(0.000177)    |
| Q2 2020      | -0.00388***<br>(0.000723) | -0.000257<br>(0.000291)   | -0.00171***<br>(0.000222)  | -0.00197***<br>(0.000380) | -0.00447***<br>(0.000461) | -0.000692<br>(0.000473)  | -0.000531**<br>(0.000204)  |
| Q3 2020      | -0.00426***<br>(0.000926) | 0.000222<br>(0.000252)    | -0.00186***<br>(0.000239)  | -0.00144**<br>(0.000594)  | -0.00404***<br>(0.000584) | -0.000138<br>(0.000515)  | -0.000706***<br>(0.000215) |
| Q4 2020      | -0.00222**<br>(0.000897)  | 0.000262<br>(0.000279)    | -0.00180***<br>(0.000258)  | 0.000292<br>(0.000532)    | -0.00281***<br>(0.000478) | -0.000300<br>(0.000588)  | -0.000689***<br>(0.000227) |
| Q1 2021      | -0.00185**<br>(0.000780)  | -0.000283<br>(0.000323)   | -0.00187***<br>(0.000211)  | 0.00163***<br>(0.000535)  | -0.00366***<br>(0.000472) | 0.000272<br>(0.000553)   | 0.0000990<br>(0.000352)    |
| Q2 2021      | 0.00141<br>(0.00137)      | 0.000348<br>(0.000582)    | -0.000750*<br>(0.000383)   | 0.00227***<br>(0.000626)  | -0.00169**<br>(0.000744)  | 0.00217***<br>(0.000585) | 0.00126***<br>(0.000190)   |
| Q3 2021      | 0.00266***<br>(0.000952)  | 0.000818**<br>(0.000315)  | -0.000526**<br>(0.000261)  | 0.00297***<br>(0.000455)  | -0.00123*<br>(0.000682)   | 0.00103<br>(0.000735)    | 0.0000316<br>(0.000415)    |
| Q4 2021      | 0.00327***<br>(0.00119)   | 0.000778*<br>(0.000406)   | 0.0000901<br>(0.000393)    | 0.00334***<br>(0.000532)  | -0.00318***<br>(0.000416) | 0.00115*<br>(0.000659)   | -0.000307<br>(0.000409)    |
| Q1 2022      | 0.00482***<br>(0.00107)   | 0.000813***<br>(0.000266) | 0.000859***<br>(0.000215)  | 0.00464***<br>(0.000849)  | -0.00246***<br>(0.000828) | 0.00175***<br>(0.000433) | 0.000427**<br>(0.000214)   |
| Q2 2022      | 0.00534***<br>(0.000735)  | 0.000914***<br>(0.000331) | 0.000344<br>(0.000265)     | 0.00652***<br>(0.000467)  | -0.00202***<br>(0.000513) | 0.00228***<br>(0.000717) | 0.000348<br>(0.000254)     |
| Observations | 120                       | 120                       | 120                        | 120                       | 120                       | 120                      | 120                        |

\*  $p < 0.10$ , \*\*  $p < 0.05$ , \*\*\*  $p < 0.01$  Standard errors in parentheses. Outcome is proportion of population with each disability type. Coefficients are relative to Q1 2019. Models are weighted by working age (18-64) population size, as calculated from CPS data, and do not include any demographic controls.

Table D2. Proportion of Sample with Disabilities in Age Group Outcome: Quarter-Level Coefficients, by Age Group

|              | (1)                        | (2)                         | (3)                         |
|--------------|----------------------------|-----------------------------|-----------------------------|
|              | 18-34                      | 35-49                       | 50-64                       |
| Q2 2018      | -0.0000793<br>(0.000118)   | -0.000625***<br>(0.0000551) | 0.000704***<br>(0.000106)   |
| Q3 2018      | -0.000663***<br>(0.000209) | -0.000101<br>(0.000149)     | 0.000764***<br>(0.000107)   |
| Q4 2018      | -0.000497***<br>(0.000177) | 0.0000707<br>(0.0000852)    | 0.000427***<br>(0.000119)   |
| Q2 2019      | 0.000838***<br>(0.000248)  | -0.000215*<br>(0.000111)    | -0.000623***<br>(0.000155)  |
| Q3 2019      | 0.000941**<br>(0.000431)   | -0.000123<br>(0.000257)     | -0.000818***<br>(0.000186)  |
| Q4 2019      | -0.0000571<br>(0.000240)   | 0.000527***<br>(0.000121)   | -0.000470***<br>(0.000137)  |
| Q1 2020      | -0.0000280<br>(0.0000902)  | 0.000341***<br>(0.0000600)  | -0.000313***<br>(0.0000707) |
| Q2 2020      | 0.000157<br>(0.000129)     | 0.000281***<br>(0.0000946)  | -0.000438***<br>(0.0000727) |
| Q3 2020      | -0.000347**<br>(0.000161)  | 0.000666***<br>(0.0000713)  | -0.000319***<br>(0.000116)  |
| Q4 2020      | -0.000208*<br>(0.000110)   | 0.000669***<br>(0.0000661)  | -0.000461***<br>(0.0000793) |
| Q1 2021      | -0.000345***<br>(0.000112) | 0.000827***<br>(0.0000653)  | -0.000482***<br>(0.0000890) |
| Q2 2021      | 0.00000145<br>(0.000239)   | 0.000836***<br>(0.0000819)  | -0.000837***<br>(0.000179)  |
| Q3 2021      | -0.000600<br>(0.000502)    | 0.00146***<br>(0.000338)    | -0.000863***<br>(0.000176)  |
| Q4 2021      | -0.00178***<br>(0.000200)  | 0.00248***<br>(0.000161)    | -0.000696***<br>(0.0000915) |
| Q1 2022      | -0.00526***<br>(0.000122)  | 0.00460***<br>(0.0000911)   | 0.000662***<br>(0.000110)   |
| Q2 2022      | -0.00467***<br>(0.000158)  | 0.00475***<br>(0.0000804)   | -0.0000712<br>(0.000203)    |
| Observations | 120                        | 120                         | 120                         |

\*  $p < 0.10$ , \*\*  $p < 0.05$ , \*\*\*  $p < 0.01$  Standard errors in parentheses. Outcome is proportion of sample with disabilities in each age group. Coefficients are relative to Q1 2019. Models are weighted by working age (18-64) population size, as calculated from CPS data, and do not include any demographic controls.



Table D3. Proportion of Sample in Demographic Group Outcome: Coefficients for Disability X Quarter Interactions, By Demographic Group

|                    | Age                      |                        |                          | Sex                      | Race                    |                         | College                 |
|--------------------|--------------------------|------------------------|--------------------------|--------------------------|-------------------------|-------------------------|-------------------------|
|                    | (1)                      | (2)                    | (3)                      | (4)                      | (5)                     | (6)                     | (7)                     |
|                    | 18-34                    | 35-49                  | 50-64                    | Female                   | Black                   | Hispanic                | BA                      |
| Disabled × Q2 2018 | -0.0117***<br>(0.00345)  | 0.00236<br>(0.00521)   | 0.00939***<br>(0.00185)  | 0.00644**<br>(0.00295)   | -0.00129<br>(0.00490)   | -0.00729**<br>(0.00326) | 0.0138***<br>(0.00210)  |
| Disabled × Q3 2018 | -0.0151***<br>(0.00405)  | 0.00205<br>(0.00510)   | 0.0130***<br>(0.00407)   | -0.00587<br>(0.00396)    | -0.00783<br>(0.00492)   | 0.00241<br>(0.00226)    | 0.0139***<br>(0.00193)  |
| Disabled × Q4 2018 | -0.00895***<br>(0.00333) | -0.00709<br>(0.00507)  | 0.0160***<br>(0.00184)   | 0.00190<br>(0.00285)     | -0.00351<br>(0.00568)   | -0.00355<br>(0.00240)   | 0.00736***<br>(0.00262) |
| Disabled × Q2 2019 | -0.00661<br>(0.00424)    | 0.00531<br>(0.00561)   | 0.00130<br>(0.00183)     | 0.00620*<br>(0.00366)    | -0.00596<br>(0.00487)   | 0.00549*<br>(0.00330)   | 0.00119<br>(0.00221)    |
| Disabled × Q3 2019 | 0.00124<br>(0.00338)     | -0.00282<br>(0.00512)  | 0.00158<br>(0.00201)     | 0.000492<br>(0.00509)    | -0.00597<br>(0.00487)   | 0.00113<br>(0.00230)    | 0.00871***<br>(0.00193) |
| Disabled × Q4 2019 | 0.00110<br>(0.00418)     | -0.00192<br>(0.00682)  | 0.000824<br>(0.00476)    | -0.0116***<br>(0.00303)  | -0.00692<br>(0.00501)   | 0.0129***<br>(0.00321)  | 0.00746***<br>(0.00205) |
| Disabled × Q1 2020 | 0.00734*<br>(0.00408)    | 0.00200<br>(0.00558)   | -0.00934**<br>(0.00397)  | -0.00526<br>(0.00330)    | -0.00238<br>(0.00647)   | 0.00319<br>(0.00263)    | -0.000818<br>(0.00219)  |
| Disabled × Q2 2020 | 0.0296***<br>(0.00558)   | -0.00895*<br>(0.00501) | -0.0207***<br>(0.00480)  | -0.0192***<br>(0.00333)  | -0.00325<br>(0.00516)   | 0.0180***<br>(0.00677)  | -0.0158***<br>(0.00349) |
| Disabled × Q3 2020 | 0.0265***<br>(0.00665)   | 0.00279<br>(0.00524)   | -0.0293***<br>(0.00569)  | -0.00969***<br>(0.00345) | -0.00984*<br>(0.00575)  | 0.0223***<br>(0.00506)  | -0.00654<br>(0.00477)   |
| Disabled × Q4 2020 | 0.00496<br>(0.00423)     | 0.00144<br>(0.00592)   | -0.00640***<br>(0.00187) | -0.0178***<br>(0.00515)  | -0.00306<br>(0.00483)   | 0.00898***<br>(0.00228) | 0.00890***<br>(0.00230) |
| Disabled × Q1 2021 | 0.0223***<br>(0.00683)   | -0.00985*<br>(0.00516) | -0.0125**<br>(0.00602)   | -0.0181***<br>(0.00437)  | -0.00591<br>(0.00539)   | 0.0100***<br>(0.00313)  | -0.00697**<br>(0.00328) |
| Disabled × Q2 2021 | 0.0197***<br>(0.00496)   | -0.00553<br>(0.00581)  | -0.0142***<br>(0.00330)  | 0.00214<br>(0.00296)     | -0.0123**<br>(0.00509)  | 0.0149***<br>(0.00288)  | 0.00355<br>(0.00450)    |
| Disabled × Q3 2021 | 0.0223***<br>(0.00372)   | -0.00923*<br>(0.00503) | -0.0131***<br>(0.00255)  | 0.000954<br>(0.00275)    | 0.00143<br>(0.00514)    | 0.0132***<br>(0.00289)  | 0.0122***<br>(0.00139)  |
| Disabled × Q4 2021 | 0.0326***<br>(0.00478)   | 0.000299<br>(0.00619)  | -0.0329***<br>(0.00696)  | -0.000495<br>(0.00301)   | -0.00681<br>(0.00582)   | 0.0121***<br>(0.00245)  | -0.000442<br>(0.00176)  |
| Disabled × Q1 2022 | 0.0437***<br>(0.00527)   | -0.00435<br>(0.00530)  | -0.0394***<br>(0.00342)  | -0.00198<br>(0.00306)    | -0.00826<br>(0.00504)   | 0.00279<br>(0.00240)    | 0.00649**<br>(0.00309)  |
| Disabled × Q2 2022 | 0.0231***<br>(0.00427)   | -0.00328<br>(0.00585)  | -0.0198***<br>(0.00590)  | 0.00437<br>(0.00332)     | -0.0143***<br>(0.00479) | 0.00440<br>(0.00306)    | 0.00233*<br>(0.00134)   |
| Observations       | 240                      | 240                    | 240                      | 240                      | 240                     | 240                     | 240                     |

\*  $p < 0.10$ , \*\*  $p < 0.05$ , \*\*\*  $p < 0.01$  Standard errors in parentheses. Outcome is proportion of sample, subset by disability status, in demographic group. Interaction coefficients are relative to Q1 2019. Models are weighted by working age (18-64) population size, as calculated from CPS data, and do not include any demographic controls.

# Appendix E

Figure E1

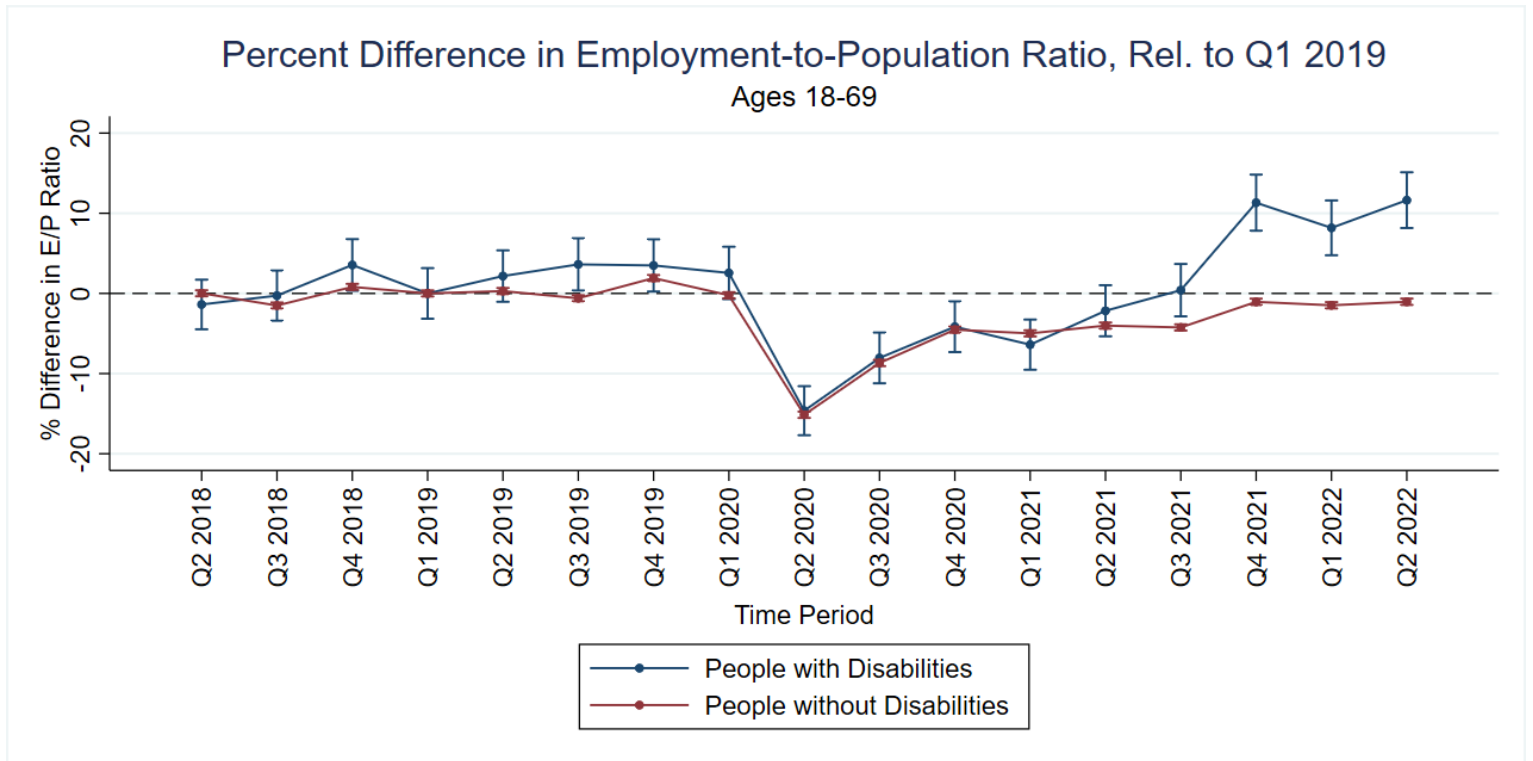

Table E1. Logged Employment Outcome: Coefficients for Disability x Quarter Interactions, By Occupational Category (Ages 18-69)

|                    | (1)                  | (2)                  | (3)                  | (4)                  | (5)                  | (6)                  | (7)                   |
|--------------------|----------------------|----------------------|----------------------|----------------------|----------------------|----------------------|-----------------------|
|                    | Emp At Work          | Essential            | Non-Ess.             | Teleworkable         | Non-Tele.            | Frontline            | Non-Front.            |
| Disabled           | -0.745**<br>(0.320)  | -0.905***<br>(0.341) | -0.406<br>(0.439)    | -1.383***<br>(0.453) | -0.240<br>(0.367)    | -0.392<br>(0.328)    | -1.039**<br>(0.404)   |
| Disabled × Q1 2020 | 0.0263<br>(0.0195)   | -0.0111<br>(0.0221)  | 0.113***<br>(0.0269) | 0.0457<br>(0.0310)   | 0.00189<br>(0.0286)  | -0.0364<br>(0.0308)  | 0.0830***<br>(0.0271) |
| Disabled × Q2 2020 | 0.0122<br>(0.0695)   | -0.00681<br>(0.0616) | 0.0512<br>(0.0990)   | 0.0409<br>(0.0580)   | -0.0169<br>(0.109)   | -0.0423<br>(0.0870)  | 0.0650<br>(0.0672)    |
| Disabled × Q3 2020 | -0.0196<br>(0.0448)  | -0.0145<br>(0.0475)  | -0.0359<br>(0.0540)  | 0.0270<br>(0.0464)   | -0.0497<br>(0.0622)  | -0.0611<br>(0.0570)  | 0.0201<br>(0.0468)    |
| Disabled × Q4 2020 | -0.00140<br>(0.0297) | 0.0164<br>(0.0352)   | -0.0519<br>(0.0349)  | 0.00706<br>(0.0472)  | -0.0120<br>(0.0378)  | -0.00571<br>(0.0417) | 0.00510<br>(0.0397)   |
| Disabled × Q1 2021 | -0.00701<br>(0.0346) | -0.0250<br>(0.0369)  | 0.0357<br>(0.0508)   | 0.0398<br>(0.0562)   | -0.0380<br>(0.0411)  | -0.0573<br>(0.0394)  | 0.0412<br>(0.0492)    |
| Disabled × Q2 2021 | -0.00555<br>(0.0313) | -0.0300<br>(0.0368)  | 0.0532<br>(0.0422)   | 0.0669<br>(0.0491)   | -0.0526<br>(0.0424)  | -0.0684<br>(0.0414)  | 0.0529<br>(0.0393)    |
| Disabled × Q3 2021 | 0.0447<br>(0.0459)   | 0.0558<br>(0.0486)   | 0.0206<br>(0.0546)   | 0.119**<br>(0.0558)  | -0.00944<br>(0.0545) | 0.00151<br>(0.0490)  | 0.0820<br>(0.0520)    |
| Disabled × Q4 2021 | 0.109***<br>(0.0335) | 0.106***<br>(0.0377) | 0.118**<br>(0.0462)  | 0.197***<br>(0.0557) | 0.0450<br>(0.0421)   | 0.0260<br>(0.0434)   | 0.182***<br>(0.0481)  |
| Disabled × Q1 2022 | 0.110***<br>(0.0368) | 0.125**<br>(0.0487)  | 0.0760<br>(0.0558)   | 0.228***<br>(0.0548) | 0.0276<br>(0.0467)   | 0.00451<br>(0.0640)  | 0.202***<br>(0.0495)  |
| Disabled × Q2 2022 | 0.122***<br>(0.0277) | 0.143***<br>(0.0327) | 0.0704<br>(0.0464)   | 0.174***<br>(0.0496) | 0.0715**<br>(0.0286) | 0.0764**<br>(0.0309) | 0.162***<br>(0.0409)  |
| Constant           | -1.585<br>(1.628)    | -1.714<br>(1.792)    | -3.128<br>(2.134)    | -2.486<br>(2.683)    | -2.390<br>(1.629)    | -2.712<br>(1.731)    | -2.021<br>(2.273)     |
| Observations       | 240                  | 240                  | 240                  | 240                  | 240                  | 240                  | 240                   |

\*  $p < 0.10$ , \*\*  $p < 0.05$ , \*\*\*  $p < 0.01$  Standard errors in parentheses. Outcome is  $\ln(\text{employed at work in [occupation type]}/\text{population})$ . Interaction coefficients are relative to Q1 2019. Models include demographic controls for age, gender, race, and education attainment of Bachelor's degree and are weighted by alternative working age (18-69) population size, as calculated from CPS data.

Figure E2

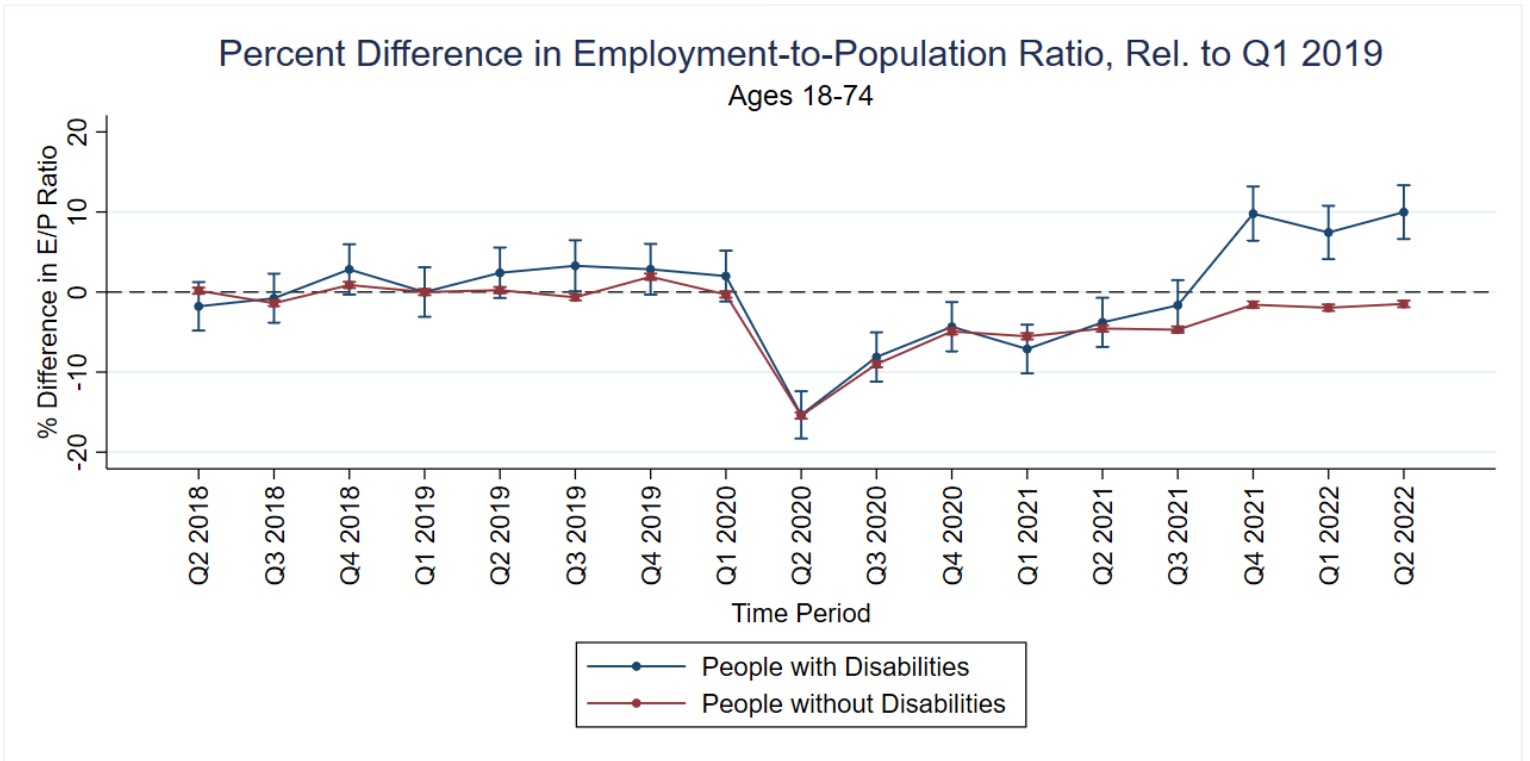

Table E2. Logged Employment Outcome: Coefficients for Disability x Quarter Interactions, By Occupational Category (Ages 18-74)

|                    | (1)                  | (2)                   | (3)                   | (4)                  | (5)                   | (6)                  | (7)                   |
|--------------------|----------------------|-----------------------|-----------------------|----------------------|-----------------------|----------------------|-----------------------|
|                    | Emp At Work          | Essential             | Non-Ess.              | Teleworkable         | Non-Tele.             | Frontline            | Non-Front.            |
| Disabled           | -1.217***<br>(0.432) | -1.461***<br>(0.477)  | -0.708<br>(0.466)     | -2.003***<br>(0.631) | -0.527<br>(0.494)     | -0.722<br>(0.455)    | -1.586***<br>(0.528)  |
| Disabled × Q1 2020 | 0.0270<br>(0.0208)   | -0.000999<br>(0.0252) | 0.0877***<br>(0.0250) | 0.0615*<br>(0.0365)  | -0.000809<br>(0.0264) | -0.0316<br>(0.0295)  | 0.0789***<br>(0.0302) |
| Disabled × Q2 2020 | 0.0180<br>(0.0707)   | 0.0106<br>(0.0658)    | 0.0303<br>(0.0902)    | 0.0690<br>(0.0563)   | -0.0179<br>(0.106)    | -0.0340<br>(0.0876)  | 0.0674<br>(0.0667)    |
| Disabled × Q3 2020 | -0.00668<br>(0.0466) | 0.00977<br>(0.0474)   | -0.0491<br>(0.0555)   | 0.0646<br>(0.0450)   | -0.0483<br>(0.0645)   | -0.0576<br>(0.0571)  | 0.0396<br>(0.0484)    |
| Disabled × Q4 2020 | 0.0213<br>(0.0227)   | 0.0487*<br>(0.0277)   | -0.0485<br>(0.0295)   | 0.0697**<br>(0.0317) | -0.0126<br>(0.0344)   | -0.00225<br>(0.0388) | 0.0423<br>(0.0287)    |
| Disabled × Q1 2021 | 0.0253<br>(0.0429)   | 0.0126<br>(0.0426)    | 0.0562<br>(0.0580)    | 0.115**<br>(0.0517)  | -0.0367<br>(0.0579)   | -0.0527<br>(0.0516)  | 0.0925*<br>(0.0506)   |
| Disabled × Q2 2021 | 0.0202<br>(0.0355)   | 0.00917<br>(0.0379)   | 0.0467<br>(0.0449)    | 0.108***<br>(0.0385) | -0.0361<br>(0.0530)   | -0.0399<br>(0.0494)  | 0.0734**<br>(0.0366)  |
| Disabled × Q3 2021 | 0.0501<br>(0.0558)   | 0.0735<br>(0.0578)    | -0.00243<br>(0.0621)  | 0.152**<br>(0.0611)  | -0.0216<br>(0.0669)   | 0.00599<br>(0.0599)  | 0.0858<br>(0.0602)    |
| Disabled × Q4 2021 | 0.139***<br>(0.0509) | 0.150***<br>(0.0517)  | 0.114*<br>(0.0638)    | 0.242***<br>(0.0586) | 0.0622<br>(0.0713)    | 0.0473<br>(0.0638)   | 0.214***<br>(0.0572)  |
| Disabled × Q1 2022 | 0.134***<br>(0.0460) | 0.153***<br>(0.0558)  | 0.0896<br>(0.0592)    | 0.280***<br>(0.0618) | 0.0319<br>(0.0597)    | 0.0128<br>(0.0709)   | 0.234***<br>(0.0564)  |
| Disabled × Q2 2022 | 0.133***<br>(0.0257) | 0.155***<br>(0.0315)  | 0.0810**<br>(0.0317)  | 0.212***<br>(0.0401) | 0.0702**<br>(0.0312)  | 0.0742**<br>(0.0348) | 0.184***<br>(0.0337)  |
| Constant           | 0.441<br>(2.033)     | 0.893<br>(2.195)      | -2.419<br>(2.292)     | -0.350<br>(3.103)    | -0.848<br>(2.277)     | -0.631<br>(2.051)    | -0.189<br>(2.584)     |
| Observations       | 240                  | 240                   | 240                   | 240                  | 240                   | 240                  | 240                   |

\*  $p < 0.10$ , \*\*  $p < 0.05$ , \*\*\*  $p < 0.01$  Standard errors in parentheses. Outcome is  $\ln(\text{employed at work in [occupation type]}/\text{population})$ . Interaction coefficients are relative to Q1 2019. Models include demographic controls for age, gender, race, and education attainment of Bachelor's degree and are weighted by alternative working age (18-74) population size, as calculated from CPS data.

Figure F1

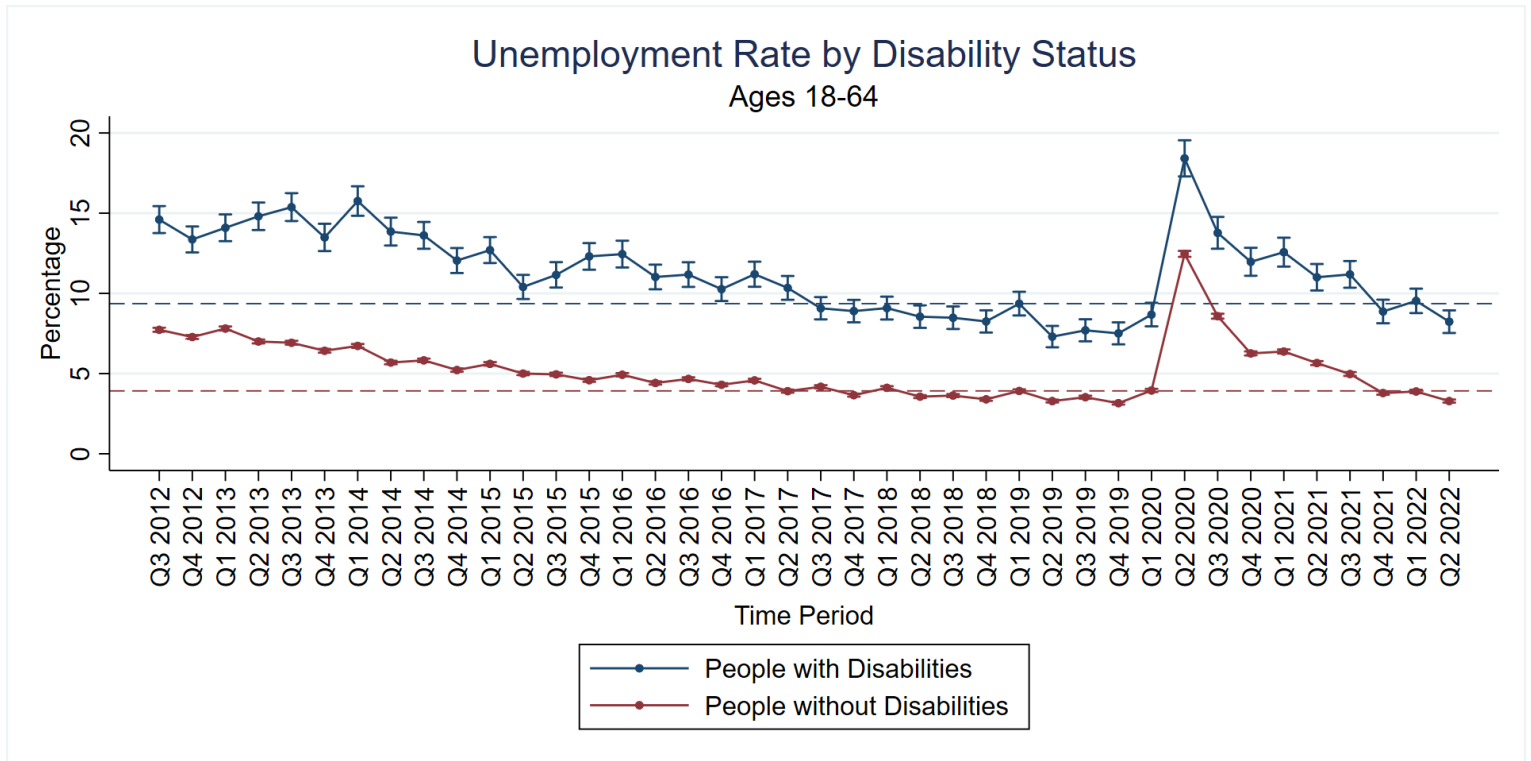

Figure F2

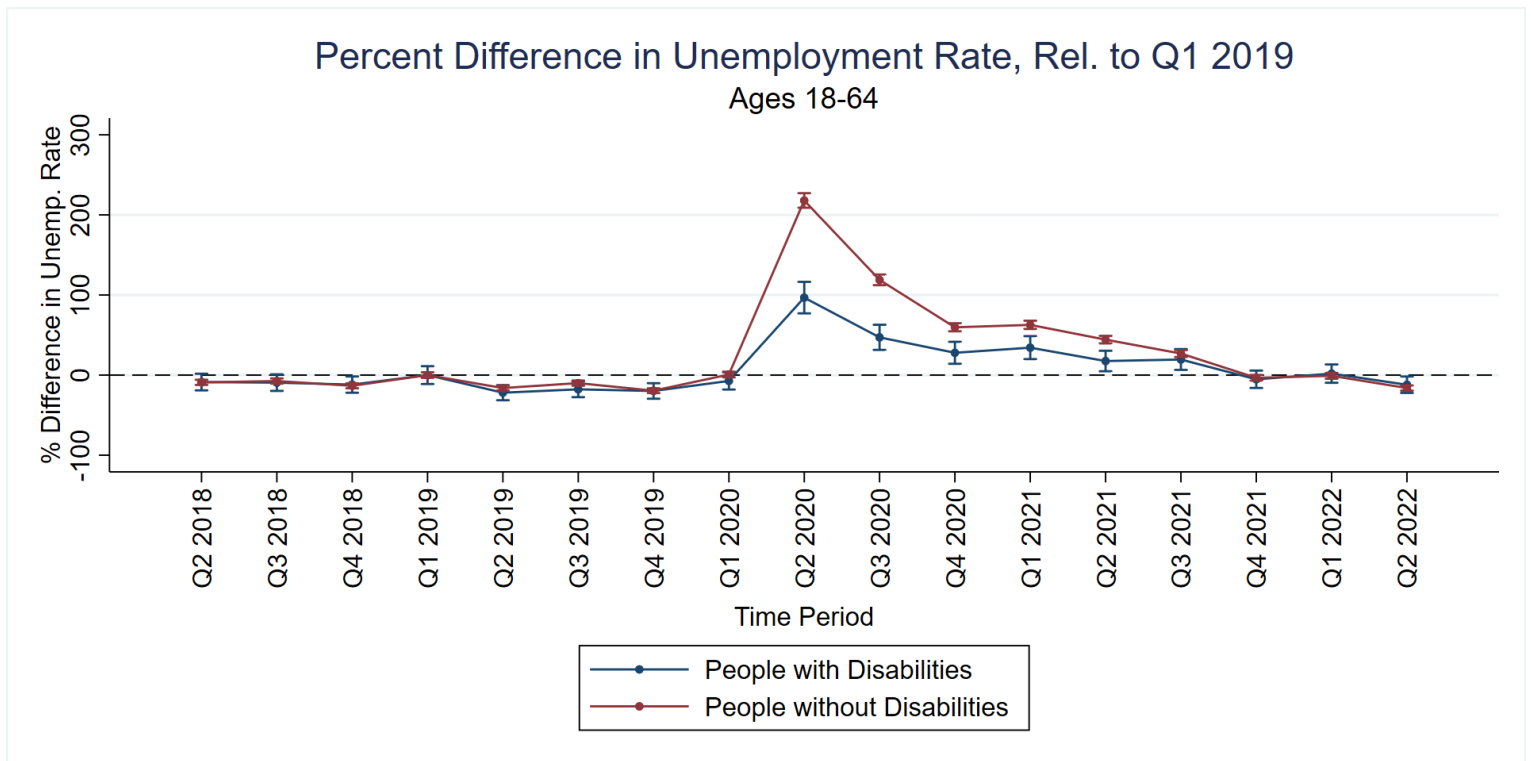

Supplement: mmc1.pdf [file mmc1.pdf]
